# Supplementary material for: Estimating impacts of LCRR's fifth-liter sampling and find-and-fix requirements on large water systems
Source: Royal Society of Chemistry journal article supplement (doi:10.1039/d3ew00631j), 2023-11-14
Supplement: d3ew00631j2.xlsx [file d3ew00631j2.xlsx]

## Sheet: Sheet1
Estimating Impacts of LCRR's Fifth-Liter Sampling and Find-and-Fix Requirements on Large Water Systems - Supplemental Dataset
Results from Michigan's 2019 LCR Compliance Monitoring showing paired 1st (L1) and 5th (L5) Liter data for homes with LSL. Additional details on how the data was obtained and QA/QC process for the data can be found in Section 2 of the supplemental information of a previous publication: https://pubs.acs.org/doi/suppl/10.1021/acs.est.1c00421/suppl_file/es1c00421_si_001.pdf
System	SiteCode	Collect.Date	NAME	ServiceLine	L1	L5	diff
System 2	DIST	2019-07-16	LEAD	LSL	0	0	0
System 2	DIST	2019-07-31	LEAD	LSL	18	0	-18
System 2	DIST	2019-07-03	LEAD	LSL	0	0	0
System 2	DIST	2019-07-24	LEAD	LSL	0	0	0
System 2	DIST	2019-07-26	LEAD	LSL	1.9	3.2	1.3
System 2	DIST	2019-07-03	LEAD	LSL	0	2.45	2.45
System 2	DIST	2019-08-13	LEAD	LSL	0	4.12	4.12
System 2	DIST	2019-07-05	LEAD	LSL	0	0	0
System 2	DIST	2019-07-15	LEAD	LSL	0	3.56	3.56
System 2	DIST	2019-07-15	LEAD	LSL	0	0	0
System 2	DIST	2019-08-13	LEAD	LSL	3.38	0	-3.38
System 2	DIST	2019-07-02	LEAD	LSL	3.75	6.08	2.33
System 2	DIST	2019-08-16	LEAD	LSL	0	7.34	7.34
System 2	DIST	2019-08-15	LEAD	LSL	2.08	0	-2.08
System 2	DIST	2019-07-26	LEAD	LSL	2	4.4	2.4
System 2	DIST	2019-07-09	LEAD	LSL	0	0	0
System 2	DIST	2019-07-16	LEAD	LSL	0	14.42	14.42
System 2	DIST	2019-07-03	LEAD	LSL	0	0	0
System 2	DIST	2019-07-30	LEAD	LSL	4.5	12	7.5
System 2	DIST	2019-07-03	LEAD	LSL	0	8.32	8.32
System 2	DIST	2019-07-03	LEAD	LSL	0	0	0
System 2	DIST	2019-07-20	LEAD	LSL	0	0	0
System 2	DIST	2019-07-16	LEAD	LSL	0	4.52	4.52
System 2	DIST	2019-07-20	LEAD	LSL	0	4.38	4.38
System 2	DIST	2019-08-21	LEAD	LSL	0	3.46	3.46
System 2	DIST	2019-07-03	LEAD	LSL	66.31	14.95	-51.36
System 2	DIST	2019-07-26	LEAD	LSL	0.47	0	-0.47
System 2	DIST	2019-08-23	LEAD	LSL	0	0	0
System 2	DIST	2019-08-15	LEAD	LSL	0	5.8	5.8
System 2	DIST	2019-08-22	LEAD	LSL	10	6.87	-3.13
System 6	DIST	2019-08-01	LEAD	LSL	0	0	0
System 6	DIST	2019-08-05	LEAD	LSL	0	0	0
System 6	DIST	2019-08-05	LEAD	LSL	4	4	0
System 6	DIST	2019-08-19	LEAD	LSL	1	0	-1
System 6	DIST	2019-08-15	LEAD	LSL	4	3	-1
System 6	DIST	2019-08-20	LEAD	LSL	0	0	0
System 6	DIST	2019-08-26	LEAD	LSL	0	0	0
System 6	DIST	2019-08-27	LEAD	LSL	2	1	-1
System 6	DIST	2019-08-20	LEAD	LSL	1	0	-1
System 6	DIST	2019-08-14	LEAD	LSL	0	0	0
System 6	DIST	2019-08-19	LEAD	LSL	2	17	15
System 6	DIST	2019-08-27	LEAD	LSL	1	0	-1
System 6	DIST	2019-08-30	LEAD	LSL	0	1	1
System 6	DIST	2019-09-05	LEAD	LSL	0	0	0
System 6	DIST	2019-09-05	LEAD	LSL	1	0	-1
System 6	DIST	2019-09-03	LEAD	LSL	0	0	0
System 6	DIST	2019-08-29	LEAD	LSL	0	0	0
System 6	DIST	2019-09-06	LEAD	LSL	1	0	-1
System 6	DIST	2019-09-05	LEAD	LSL	0	0	0
System 6	DIST	2019-09-06	LEAD	LSL	0	0	0
System 6	DIST	2019-09-05	LEAD	LSL	0	0	0
System 6	DIST	2019-09-09	LEAD	LSL	0	0	0
System 6	DIST	2019-09-05	LEAD	LSL	0	0	0
System 6	DIST	2019-09-19	LEAD	LSL	0	0	0
System 6	DIST	2019-09-13	LEAD	LSL	0	0	0
System 6	DIST	2019-09-16	LEAD	LSL	0	0	0
System 6	DIST	2019-09-13	LEAD	LSL	0	0	0
System 6	DIST	2019-09-17	LEAD	LSL	0	0	0
System 6	DIST	2019-09-20	LEAD	LSL	0	60	60
System 6	DIST	2019-09-13	LEAD	LSL	0	0	0
System 8	DIST	2019-11-11	LEAD	LSL	0	8	8
System 8	DIST	2019-11-10	LEAD	LSL	4.4	3.9	-0.5
System 8	DIST	2019-11-30	LEAD	LSL	3.1	3.1	0
System 8	DIST	2019-12-03	LEAD	LSL	22	32	10
System 8	DIST	2019-12-03	LEAD	LSL	10	12	2
System 8	DIST	2019-12-05	LEAD	LSL	3.4	1.9	-1.5
System 8	DIST	2019-12-02	LEAD	LSL	0	0	0
System 8	DIST	2019-12-04	LEAD	LSL	16	7.3	-8.7
System 8	DIST	2019-12-09	LEAD	LSL	9.3	1.8	-7.5
System 8	DIST	2019-12-09	LEAD	LSL	8.6	5.3	-3.3
System 8	DIST	2019-12-10	LEAD	LSL	38	24	-14
System 8	DIST	2019-12-03	LEAD	LSL	0	0	0
System 8	DIST	2019-12-03	LEAD	LSL	0	0	0
System 8	DIST	2019-12-05	LEAD	LSL	72	39	-33
System 8	DIST	2019-12-11	LEAD	LSL	25	18	-7
System 8	DIST	2019-12-10	LEAD	LSL	23	9.4	-13.6
System 8	DIST	2019-12-11	LEAD	LSL	9.2	6.3	-2.9
System 8	DIST	2019-12-12	LEAD	LSL	3.6	2.2	-1.4
System 8	DIST	2019-12-13	LEAD	LSL	0	0	0
System 8	DIST	2019-12-13	LEAD	LSL	0	0	0
System 8	DIST	2019-12-13	LEAD	LSL	0	0	0
System 8	DIST	2019-12-16	LEAD	LSL	0	0	0
System 8	DIST	2019-12-11	LEAD	LSL	33	21	-12
System 8	DIST	2019-12-11	LEAD	LSL	4.9	11	6.1
System 8	DIST	2019-12-16	LEAD	LSL	3.7	14	10.3
System 8	DIST	2019-12-17	LEAD	LSL	5.6	0	-5.6
System 8	DIST	2019-12-18	LEAD	LSL	2.3	0	-2.3
System 8	DIST	2019-12-19	LEAD	LSL	19	40	21
System 8	DIST	2019-12-19	LEAD	LSL	18	11	-7
System 8	DIST	2019-12-18	LEAD	LSL	10	7.8	-2.2
System 8	DIST	2019-12-20	LEAD	LSL	0	0	0
System 8	DIST	2019-12-21	LEAD	LSL	19	30	11
System 8	DIST	2019-06-25	LEAD	LSL	14	18	4
System 8	DIST	2019-06-25	LEAD	LSL	9	8	-1
System 8	DIST	2019-06-27	LEAD	LSL	2	3	1
System 8	DIST	2019-06-26	LEAD	LSL	6	7	1
System 8	DIST	2019-06-26	LEAD	LSL	2	3	1
System 8	DIST	2019-06-27	LEAD	LSL	0	0	0
System 8	DIST	2019-06-24	LEAD	LSL	44	23	-21
System 8	DIST	2019-06-25	LEAD	LSL	0	0	0
System 8	DIST	2019-06-26	LEAD	LSL	10	36	26
System 8	DIST	2019-06-29	LEAD	LSL	1	1	0
System 8	DIST	2019-06-27	LEAD	LSL	2	2	0
System 8	DIST	2019-06-24	LEAD	LSL	11	19	8
System 8	DIST	2019-06-25	LEAD	LSL	4	2	-2
System 8	DIST	2019-06-25	LEAD	LSL	15	6	-9
System 8	DIST	2019-06-25	LEAD	LSL	3	2	-1
System 8	DIST	2019-06-27	LEAD	LSL	4	21	17
System 8	DIST	2019-06-24	LEAD	LSL	12	17	5
System 8	DIST	2019-06-26	LEAD	LSL	0	0	0
System 8	DIST	2019-06-25	LEAD	LSL	3	3	0
System 8	DIST	2019-06-27	LEAD	LSL	4	5	1
System 8	DIST	2019-06-25	LEAD	LSL	0	0	0
System 8	DIST	2019-06-24	LEAD	LSL	7	5	-2
System 8	DIST	2019-06-25	LEAD	LSL	5	12	7
System 8	DIST	2019-06-27	LEAD	LSL	22	24	2
System 8	DIST	2019-06-26	LEAD	LSL	1	0	-1
System 8	DIST	2019-06-28	LEAD	LSL	7	7	0
System 8	DIST	2019-06-25	LEAD	LSL	0	0	0
System 8	DIST	2019-06-26	LEAD	LSL	4	11	7
System 8	DIST	2019-06-26	LEAD	LSL	4	0	-4
System 8	DIST	2019-06-25	LEAD	LSL	5	3	-2
System 8	DIST	2019-06-26	LEAD	LSL	3	2	-1
System 8	DIST	2019-06-25	LEAD	LSL	21	13	-8
System 8	DIST	2019-06-27	LEAD	LSL	8	31	23
System 8	DIST	2019-06-25	LEAD	LSL	35	22	-13
System 8	DIST	2019-06-26	LEAD	LSL	23	8	-15
System 8	DIST	2019-06-26	LEAD	LSL	13	5	-8
System 8	DIST	2019-06-25	LEAD	LSL	0	0	0
System 8	DIST	2019-06-25	LEAD	LSL	0	0	0
System 8	DIST	2019-06-25	LEAD	LSL	5	5	0
System 8	DIST	2019-06-25	LEAD	LSL	0	0	0
System 8	DIST	2019-06-27	LEAD	LSL	29	59	30
System 8	DIST	2019-06-27	LEAD	LSL	14	12	-2
System 8	DIST	2019-06-27	LEAD	LSL	8	5	-3
System 8	DIST	2019-06-26	LEAD	LSL	6	3	-3
System 8	DIST	2019-06-26	LEAD	LSL	3	3	0
System 8	DIST	2019-06-25	LEAD	LSL	12	12	0
System 8	DIST	2019-10-29	LEAD	LSL	7	7	0
System 8	DIST	2019-11-01	LEAD	LSL	4	3	-1
System 8	DIST	2019-11-01	LEAD	LSL	0	0	0
System 8	DIST	2019-10-29	LEAD	LSL	2	5	3
System 8	DIST	2019-10-26	LEAD	LSL	4	4	0
System 8	DIST	2019-10-25	LEAD	LSL	0	2	2
System 8	DIST	2019-10-29	LEAD	LSL	2	1	-1
System 9	DIST	2019-08-27	LEAD	LSL	17	18	1
System 9	DIST	2019-08-27	LEAD	LSL	0	3.5	3.5
System 9	DIST	2019-08-28	LEAD	LSL	3.6	0	-3.6
System 9	DIST	2019-08-28	LEAD	LSL	1.7	2	0.3
System 9	DIST	2019-08-28	LEAD	LSL	9.9	14	4.1
System 9	DIST	2019-08-28	LEAD	LSL	2.7	2.8	0.1
System 9	DIST	2019-08-28	LEAD	LSL	6.5	1.7	-4.8
System 9	DIST	2019-08-27	LEAD	LSL	4.3	2.6	-1.7
System 9	DIST	2019-08-28	LEAD	LSL	1.4	1.3	-0.1
System 9	DIST	2019-08-28	LEAD	LSL	4.1	6	1.9
System 9	DIST	2019-08-27	LEAD	LSL	2.3	5.4	3.1
System 9	DIST	2019-08-27	LEAD	LSL	6.4	22	15.6
System 9	DIST	2019-08-28	LEAD	LSL	6.7	17	10.3
System 9	DIST	2019-08-27	LEAD	LSL	1.1	0	-1.1
System 9	DIST	2019-08-28	LEAD	LSL	6.5	9.9	3.4
System 9	DIST	2019-08-28	LEAD	LSL	2.9	6.8	3.9
System 9	DIST	2019-08-28	LEAD	LSL	0	0	0
System 9	DIST	2019-08-28	LEAD	LSL	0	1.5	1.5
System 9	DIST	2019-08-28	LEAD	LSL	0	0	0
System 9	DIST	2019-08-28	LEAD	LSL	2.2	5.8	3.6
System 9	DIST	2019-09-06	LEAD	LSL	2.9	2.1	-0.8
System 9	DIST	2019-09-06	LEAD	LSL	1.5	1.9	0.4
System 9	DIST	2019-09-06	LEAD	LSL	1.7	5.9	4.2
System 9	DIST	2019-09-06	LEAD	LSL	1.5	1.7	0.2
System 9	DIST	2019-09-06	LEAD	LSL	1	1	0
System 9	DIST	2019-09-06	LEAD	LSL	7.4	4.1	-3.3
System 9	DIST	2019-09-09	LEAD	LSL	4.7	3.2	-1.5
System 9	DIST	2019-09-25	LEAD	LSL	0	0	0
System 9	DIST	2019-09-25	LEAD	LSL	0	0	0
System 9	DIST	2019-09-26	LEAD	LSL	0	0	0
System 10	DIST	2019-07-16	LEAD	LSL	7	4	-3
System 10	DIST	2019-07-16	LEAD	LSL	150	1.8	-148.2
System 10	DIST	2019-07-16	LEAD	LSL	2.6	4.6	2
System 10	DIST	2019-07-16	LEAD	LSL	1.3	1.3	0
System 10	DIST	2019-07-17	LEAD	LSL	3.6	4.4	0.8
System 10	DIST	2019-07-22	LEAD	LSL	2.1	2	-0.1
System 10	DIST	2019-07-19	LEAD	LSL	3.7	2.9	-0.8
System 10	DIST	2019-07-19	LEAD	LSL	2.8	19	16.2
System 10	DIST	2019-07-19	LEAD	LSL	7.2	5	-2.2
System 10	DIST	2019-07-26	LEAD	LSL	1.3	5.3	4
System 10	DIST	2019-07-26	LEAD	LSL	1.5	2	0.5
System 10	DIST	2019-07-22	LEAD	LSL	1.2	3.6	2.4
System 10	DIST	2019-07-21	LEAD	LSL	9.2	9.4	0.2
System 10	DIST	2019-07-25	LEAD	LSL	2.2	2.2	0
System 10	DIST	2019-07-25	LEAD	LSL	2.4	8.2	5.8
System 10	DIST	2019-07-27	LEAD	LSL	0	0	0
System 10	DIST	2019-07-30	LEAD	LSL	0	2.5	2.5
System 10	DIST	2019-07-27	LEAD	LSL	1.8	1.9	0.1
System 10	DIST	2019-07-29	LEAD	LSL	1.9	3.7	1.8
System 10	DIST	2019-07-31	LEAD	LSL	1.7	1.5	-0.2
System 10	DIST	2019-08-05	LEAD	LSL	1.6	10	8.4
System 10	DIST	2019-08-06	LEAD	LSL	3.3	16	12.7
System 10	DIST	2019-08-14	LEAD	LSL	1.9	2.4	0.5
System 10	DIST	2019-08-14	LEAD	LSL	2.3	34	31.7
System 10	DIST	2019-08-12	LEAD	LSL	8	11	3
System 10	DIST	2019-08-14	LEAD	LSL	1.3	3.1	1.8
System 10	DIST	2019-08-18	LEAD	LSL	0	0	0
System 10	DIST	2019-08-19	LEAD	LSL	0	2.1	2.1
System 10	DIST	2019-08-29	LEAD	LSL	1.2	5.9	4.7
System 10	DIST	2019-08-26	LEAD	LSL	17	5.6	-11.4
System 10	DIST	2019-09-03	LEAD	LSL	0	1.9	1.9
System 10	DIST	2019-09-09	LEAD	LSL	2.6	7.6	5
System 10	DIST	2019-09-16	LEAD	LSL	34	1	-33
System 11	DIST	2019-07-17	LEAD	LSL	0	0	0
System 11	DIST	2019-07-16	LEAD	LSL	0	0	0
System 11	DIST	2019-07-17	LEAD	LSL	0	0	0
System 11	DIST	2019-07-16	LEAD	LSL	0	0	0
System 11	DIST	2019-07-16	LEAD	LSL	0	0	0
System 11	DIST	2019-07-18	LEAD	LSL	0	0	0
System 11	DIST	2019-07-16	LEAD	LSL	4	0	-4
System 11	DIST	2019-07-18	LEAD	LSL	0	0	0
System 11	DIST	2019-07-26	LEAD	LSL	0	0	0
System 11	DIST	2019-07-26	LEAD	LSL	0	0	0
System 11	DIST	2019-07-29	LEAD	LSL	0	0	0
System 11	DIST	2019-08-14	LEAD	LSL	0	1	1
System 11	DIST	2019-08-22	LEAD	LSL	0	1	1
System 11	DIST	2019-08-21	LEAD	LSL	0	0	0
System 11	DIST	2019-08-25	LEAD	LSL	0	0	0
System 11	DIST	2019-08-27	LEAD	LSL	0	0	0
System 11	DIST	2019-09-03	LEAD	LSL	0	0	0
System 11	DIST	2019-08-30	LEAD	LSL	0	0	0
System 11	DIST	2019-09-03	LEAD	LSL	0	0	0
System 11	DIST	2019-09-19	LEAD	LSL	0	0	0
System 12	DIST	2019-06-04	LEAD	LSL	0	0	0
System 12	DIST	2019-06-04	LEAD	LSL	0	0	0
System 12	DIST	2019-06-04	LEAD	LSL	3	2	-1
System 12	DIST	2019-06-04	LEAD	LSL	0	0	0
System 12	DIST	2019-06-04	LEAD	LSL	2	2	0
System 12	DIST	2019-06-04	LEAD	LSL	0	0	0
System 12	DIST	2019-06-04	LEAD	LSL	0	0	0
System 12	DIST	2019-06-04	LEAD	LSL	2	2	0
System 12	DIST	2019-06-04	LEAD	LSL	0	0	0
System 12	DIST	2019-06-04	LEAD	LSL	0	0	0
System 12	DIST	2019-07-09	LEAD	LSL	0	0	0
System 12	DIST	2019-07-09	LEAD	LSL	0	0	0
System 12	DIST	2019-07-09	LEAD	LSL	0	0	0
System 12	DIST	2019-07-09	LEAD	LSL	0	0	0
System 12	DIST	2019-07-08	LEAD	LSL	0	0	0
System 12	DIST	2019-07-09	LEAD	LSL	0	0	0
System 12	DIST	2019-07-09	LEAD	LSL	0	2	2
System 12	DIST	2019-07-09	LEAD	LSL	0	0	0
System 12	DIST	2019-07-09	LEAD	LSL	0	1	1
System 12	DIST	2019-07-09	LEAD	LSL	0	0	0
System 15	DIST	2019-06-25	LEAD	LSL	0	0	0
System 15	DIST	2019-06-25	LEAD	LSL	2.35	0	-2.35
System 15	DIST	2019-06-25	LEAD	LSL	0	0	0
System 15	DIST	2019-06-24	LEAD	LSL	0	8.92	8.92
System 15	DIST	2019-06-25	LEAD	LSL	2.8	0	-2.8
System 15	DIST	2019-06-25	LEAD	LSL	0	0	0
System 15	DIST	2019-06-24	LEAD	LSL	0	0	0
System 15	DIST	2019-06-27	LEAD	LSL	0	0	0
System 15	DIST	2019-06-26	LEAD	LSL	0	0	0
System 15	DIST	2019-06-25	LEAD	LSL	0	0	0
System 15	DIST	2019-06-25	LEAD	LSL	0	0	0
System 15	DIST	2019-06-27	LEAD	LSL	0	0	0
System 15	DIST	2019-06-28	LEAD	LSL	0	7.54	7.54
System 15	DIST	2019-06-26	LEAD	LSL	0	0	0
System 15	DIST	2019-06-27	LEAD	LSL	13.55	15.38	1.83
System 15	DIST	2019-06-26	LEAD	LSL	0	0	0
System 15	DIST	2019-07-01	LEAD	LSL	0	0	0
System 15	DIST	2019-07-01	LEAD	LSL	0	0	0
System 15	DIST	2019-07-02	LEAD	LSL	0	0	0
System 15	DIST	2019-07-02	LEAD	LSL	0	0	0
System 15	DIST	2019-07-03	LEAD	LSL	0	0	0
System 19	DIST	2019-05-15	LEAD	LSL	0	0	0
System 19	DIST	2019-05-15	LEAD	LSL	0	0	0
System 19	DIST	2019-05-15	LEAD	LSL	0	0	0
System 19	DIST	2019-05-15	LEAD	LSL	0	0	0
System 19	DIST	2019-05-15	LEAD	LSL	0	1	1
System 19	DIST	2019-05-15	LEAD	LSL	0	0	0
System 19	DIST	2019-05-15	LEAD	LSL	0	0	0
System 19	DIST	2019-05-15	LEAD	LSL	0	0	0
System 19	DIST	2019-05-15	LEAD	LSL	3	0	-3
System 19	DIST	2019-05-15	LEAD	LSL	0	0	0
System 19	DIST	2019-05-15	LEAD	LSL	0	5	5
System 19	DIST	2019-05-15	LEAD	LSL	0	0	0
System 19	DIST	2019-05-15	LEAD	LSL	0	0	0
System 19	DIST	2019-05-15	LEAD	LSL	0	0	0
System 19	DIST	2019-05-21	LEAD	LSL	0	0	0
System 19	DIST	2019-05-22	LEAD	LSL	0	0	0
System 19	DIST	2019-05-23	LEAD	LSL	0	0	0
System 19	DIST	2019-05-20	LEAD	LSL	0	0	0
System 19	DIST	2019-06-03	LEAD	LSL	0	0	0
System 19	DIST	2019-06-03	LEAD	LSL	0	0	0
System 19	DIST	2019-10-23	LEAD	LSL	0	0	0
System 19	DIST	2019-10-22	LEAD	LSL	0	14	14
System 19	DIST	2019-10-23	LEAD	LSL	0	0	0
System 19	DIST	2019-10-23	LEAD	LSL	0	0	0
System 19	DIST	2019-10-23	LEAD	LSL	0	0	0
System 19	DIST	2019-10-23	LEAD	LSL	0	0	0
System 19	DIST	2019-10-22	LEAD	LSL	0	0	0
System 19	DIST	2019-10-23	LEAD	LSL	0	0	0
System 19	DIST	2019-10-23	LEAD	LSL	0	0	0
System 19	DIST	2019-10-23	LEAD	LSL	0	0	0
System 19	DIST	2019-10-23	LEAD	LSL	2	0	-2
System 19	DIST	2019-10-23	LEAD	LSL	0	0	0
System 19	DIST	2019-10-24	LEAD	LSL	0	0	0
System 19	DIST	2019-10-24	LEAD	LSL	0	0	0
System 19	DIST	2019-10-24	LEAD	LSL	0	0	0
System 19	DIST	2019-10-24	LEAD	LSL	0	0	0
System 19	DIST	2019-10-24	LEAD	LSL	0	0	0
System 19	DIST	2019-10-29	LEAD	LSL	0	1	1
System 19	DIST	2019-10-25	LEAD	LSL	0	0	0
System 19	DIST	2019-10-25	LEAD	LSL	0	0	0
System 20	DIST	2019-08-05	LEAD	LSL	2.2	1.7	-0.5
System 20	DIST	2019-08-05	LEAD	LSL	0	0	0
System 20	DIST	2019-08-05	LEAD	LSL	0	0	0
System 20	DIST	2019-08-05	LEAD	LSL	0	0	0
System 20	DIST	2019-08-05	LEAD	LSL	2.5	4.5	2
System 20	DIST	2019-08-05	LEAD	LSL	0	0	0
System 20	DIST	2019-08-05	LEAD	LSL	0	0	0
System 20	DIST	2019-08-06	LEAD	LSL	0	0	0
System 20	DIST	2019-08-06	LEAD	LSL	0	1.3	1.3
System 20	DIST	2019-08-06	LEAD	LSL	4.2	1.6	-2.6
System 20	DIST	2019-08-06	LEAD	LSL	1.5	0	-1.5
System 20	DIST	2019-08-06	LEAD	LSL	0	0	0
System 20	DIST	2019-08-06	LEAD	LSL	2.9	2.4	-0.5
System 20	DIST	2019-08-07	LEAD	LSL	110	5.9	-104.1
System 20	DIST	2019-08-07	LEAD	LSL	1.7	2.1	0.4
System 20	DIST	2019-08-07	LEAD	LSL	0	1.1	1.1
System 20	DIST	2019-08-07	LEAD	LSL	3.2	2.5	-0.7
System 20	DIST	2019-08-08	LEAD	LSL	1.1	2.1	1
System 20	DIST	2019-08-08	LEAD	LSL	2	2.3	0.3
System 20	DIST	2019-08-08	LEAD	LSL	1.7	5.2	3.5
System 20	DIST	2019-08-08	LEAD	LSL	0	0	0
System 20	DIST	2019-08-08	LEAD	LSL	1.7	1.2	-0.5
System 20	DIST	2019-08-08	LEAD	LSL	2.5	0	-2.5
System 20	DIST	2019-08-08	LEAD	LSL	1	0	-1
System 20	DIST	2019-08-08	LEAD	LSL	0	1.1	1.1
System 20	DIST	2019-08-08	LEAD	LSL	4	7.1	3.1
System 20	DIST	2019-08-08	LEAD	LSL	0	0	0
System 20	DIST	2019-08-09	LEAD	LSL	1.1	0	-1.1
System 20	DIST	2019-08-09	LEAD	LSL	0	0	0
System 20	DIST	2019-08-09	LEAD	LSL	0	0	0
System 21	DIST	2019-08-05	LEAD	LSL	1.1	2.5	1.4
System 21	DIST	2019-08-07	LEAD	LSL	3.2	4.4	1.2
System 21	DIST	2019-08-06	LEAD	LSL	0.49	0.83	0.34
System 21	DIST	2019-08-05	LEAD	LSL	0.27	0.55	0.28
System 21	DIST	2019-08-12	LEAD	LSL	5.5	19	13.5
System 21	DIST	2019-08-05	LEAD	LSL	1.9	3.2	1.3
System 21	DIST	2019-08-05	LEAD	LSL	0.87	0.85	-0.02
System 21	DIST	2019-08-12	LEAD	LSL	1	2	1
System 21	DIST	2019-08-10	LEAD	LSL	1.8	6.7	4.9
System 21	DIST	2019-08-08	LEAD	LSL	2	3.1	1.1
System 21	DIST	2019-08-06	LEAD	LSL	0.88	0.89	0.01
System 21	DIST	2019-08-14	LEAD	LSL	0	0	0
System 21	DIST	2019-08-03	LEAD	LSL	0.32	0.96	0.64
System 21	DIST	2019-08-15	LEAD	LSL	0	9.29	9.29
System 21	DIST	2019-08-08	LEAD	LSL	1.3	2	0.7
System 21	DIST	2019-08-14	LEAD	LSL	0	0	0
System 21	DIST	2019-08-14	LEAD	LSL	0	2.14	2.14
System 21	DIST	2019-08-03	LEAD	LSL	9.7	7.5	-2.2
System 21	DIST	2019-08-07	LEAD	LSL	1.6	3.7	2.1
System 21	DIST	2019-08-14	LEAD	LSL	0	5.77	5.77
System 21	DIST	2019-08-05	LEAD	LSL	4.1	4.3	0.2
System 21	DIST	2019-08-06	LEAD	LSL	1.1	4.6	3.5
System 21	DIST	2019-08-06	LEAD	LSL	1.8	8.8	7
System 21	DIST	2019-08-06	LEAD	LSL	2.2	15	12.8
System 21	DIST	2019-08-06	LEAD	LSL	1.7	7.6	5.9
System 21	DIST	2019-08-07	LEAD	LSL	0.65	0.59	-0.06
System 21	DIST	2019-08-07	LEAD	LSL	7.5	5.4	-2.1
System 21	DIST	2019-08-07	LEAD	LSL	2.5	2.6	0.1
System 21	DIST	2019-08-07	LEAD	LSL	2.4	3.6	1.2
System 21	DIST	2019-08-07	LEAD	LSL	0	0	0
System 21	DIST	2019-08-11	LEAD	LSL	3.61	3.97	0.36
System 22	DIST	2019-08-08	LEAD	LSL	3.9	1.6	-2.3
System 22	DIST	2019-08-01	LEAD	LSL	15	9.4	-5.6
System 22	DIST	2019-08-08	LEAD	LSL	7.8	40	32.2
System 22	DIST	2019-08-08	LEAD	LSL	1.5	6	4.5
System 22	DIST	2019-08-01	LEAD	LSL	2.2	17	14.8
System 22	DIST	2019-07-31	LEAD	LSL	21	41	20
System 22	DIST	2019-08-01	LEAD	LSL	1.8	1.5	-0.3
System 22	DIST	2019-08-01	LEAD	LSL	0.76	0.66	-0.1
System 22	DIST	2019-08-01	LEAD	LSL	1.2	1.8	0.6
System 22	DIST	2019-08-01	LEAD	LSL	2.9	3	0.1
System 22	DIST	2019-08-01	LEAD	LSL	4.5	12	7.5
System 22	DIST	2019-08-01	LEAD	LSL	5.2	34	28.8
System 22	DIST	2019-07-31	LEAD	LSL	0.81	2.7	1.89
System 22	DIST	2019-08-01	LEAD	LSL	7	7	0
System 22	DIST	2019-08-01	LEAD	LSL	2.2	2.3	0.1
System 22	DIST	2019-08-01	LEAD	LSL	0	0	0
System 22	DIST	2019-08-05	LEAD	LSL	3.21	5.29	2.08
System 22	DIST	2019-08-06	LEAD	LSL	2.26	0	-2.26
System 22	DIST	2019-08-05	LEAD	LSL	6.4	35	28.6
System 22	DIST	2019-08-07	LEAD	LSL	0	0	0
System 22	DIST	2019-08-06	LEAD	LSL	1.4	1.2	-0.2
System 22	DIST	2019-08-05	LEAD	LSL	12	2	-10
System 22	DIST	2019-08-07	LEAD	LSL	2.9	4.1	1.2
System 22	DIST	2019-08-08	LEAD	LSL	0.2	0.07	-0.13
System 22	DIST	2019-08-07	LEAD	LSL	8	1.8	-6.2
System 22	DIST	2019-08-07	LEAD	LSL	1.8	4.1	2.3
System 22	DIST	2019-08-07	LEAD	LSL	3.3	3.4	0.1
System 22	DIST	2019-08-07	LEAD	LSL	1.7	1.5	-0.2
System 22	DIST	2019-09-14	LEAD	LSL	0	2.47	2.47
System 22	DIST	2019-08-08	LEAD	LSL	2.6	1.5	-1.1
System 23	DIST	2019-08-29	LEAD	LSL	0	0	0
System 23	DIST	2019-07-29	LEAD	LSL	9	11	2
System 23	DIST	2019-07-17	LEAD	LSL	0	0	0
System 23	DIST	2019-07-12	LEAD	LSL	0	4.1	4.1
System 23	DIST	2019-07-18	LEAD	LSL	0	4.07	4.07
System 23	DIST	2019-06-26	LEAD	LSL	4.1	8.65	4.55
System 23	DIST	2019-08-30	LEAD	LSL	0	0	0
System 23	DIST	2019-08-13	LEAD	LSL	0	0	0
System 23	DIST	2019-07-02	LEAD	LSL	0	0	0
System 23	DIST	2019-07-19	LEAD	LSL	0	0	0
System 23	DIST	2019-08-29	LEAD	LSL	0	0	0
System 23	DIST	2019-07-19	LEAD	LSL	0	0	0
System 23	DIST	2019-07-17	LEAD	LSL	2.33	0	-2.33
System 23	DIST	2019-07-18	LEAD	LSL	3.13	8.9	5.77
System 23	DIST	2019-07-08	LEAD	LSL	0	0	0
System 23	DIST	2019-08-30	LEAD	LSL	0	0	0
System 23	DIST	2019-07-18	LEAD	LSL	0	9.92	9.92
System 23	DIST	2019-08-29	LEAD	LSL	0	0	0
System 23	DIST	2019-07-10	LEAD	LSL	0	0	0
System 23	DIST	2019-07-19	LEAD	LSL	0	2.6	2.6
System 23	DIST	2019-07-19	LEAD	LSL	0	10.19	10.19
System 23	DIST	2019-07-15	LEAD	LSL	0	0	0
System 23	DIST	2019-08-29	LEAD	LSL	6.66	9.81	3.15
System 23	DIST	2019-07-03	LEAD	LSL	0	0	0
System 23	DIST	2019-07-22	LEAD	LSL	4.18	6.98	2.8
System 23	DIST	2019-07-10	LEAD	LSL	0	0	0
System 23	DIST	2019-07-22	LEAD	LSL	4.01	8.33	4.32
System 23	DIST	2019-07-08	LEAD	LSL	0	0	0
System 23	DIST	2019-07-28	LEAD	LSL	9.02	11.61	2.59
System 23	DIST	2019-08-30	LEAD	LSL	2.37	9.7	7.33
System 23	DIST	2019-07-17	LEAD	LSL	2.12	8.71	6.59
System 23	DIST	2019-08-29	LEAD	LSL	0	3.9	3.9
System 23	DIST	2019-08-30	LEAD	LSL	0	3.53	3.53
System 23	DIST	2019-08-30	LEAD	LSL	0	0	0
System 23	DIST	2019-08-30	LEAD	LSL	114.47	6.27	-108.2
System 23	DIST	2019-09-10	LEAD	LSL	2.78	4.69	1.91
System 23	DIST	2019-09-10	LEAD	LSL	6.9	5.02	-1.88
System 23	DIST	2019-06-11	LEAD	LSL	0	0	0
System 23	DIST	2019-06-12	LEAD	LSL	0	0	0
System 23	DIST	2019-06-12	LEAD	LSL	0	3.37	3.37
System 23	DIST	2019-06-20	LEAD	LSL	0	0	0
System 23	DIST	2019-06-13	LEAD	LSL	2.48	4.29	1.81
System 23	DIST	2019-06-13	LEAD	LSL	0	0	0
System 23	DIST	2019-06-13	LEAD	LSL	0	0	0
System 23	DIST	2019-06-13	LEAD	LSL	2.6	2.32	-0.28
System 23	DIST	2019-06-13	LEAD	LSL	0	0	0
System 23	DIST	2019-06-12	LEAD	LSL	0	0	0
System 23	DIST	2019-07-18	LEAD	LSL	0	0	0
System 23	DIST	2019-09-11	LEAD	LSL	0	3.38	3.38
System 24	DIST	2019-06-14	LEAD	LSL	1	0	-1
System 24	DIST	2019-06-13	LEAD	LSL	2	3	1
System 24	DIST	2019-06-13	LEAD	LSL	0	0	0
System 24	DIST	2019-06-13	LEAD	LSL	2	0	-2
System 24	DIST	2019-06-12	LEAD	LSL	5	1	-4
System 24	DIST	2019-06-11	LEAD	LSL	0	0	0
System 24	DIST	2019-06-12	LEAD	LSL	4	3	-1
System 24	DIST	2019-06-14	LEAD	LSL	1	0	-1
System 24	DIST	2019-06-17	LEAD	LSL	3	2	-1
System 24	DIST	2019-06-14	LEAD	LSL	2	0	-2
System 24	DIST	2019-06-14	LEAD	LSL	0	0	0
System 24	DIST	2019-06-13	LEAD	LSL	0	0	0
System 24	DIST	2019-06-13	LEAD	LSL	0	0	0
System 24	DIST	2019-06-13	LEAD	LSL	2	3	1
System 24	DIST	2019-06-13	LEAD	LSL	6	10	4
System 24	DIST	2019-06-12	LEAD	LSL	0	0	0
System 24	DIST	2019-06-12	LEAD	LSL	0	0	0
System 24	DIST	2019-06-12	LEAD	LSL	8	6	-2
System 24	DIST	2019-06-20	LEAD	LSL	7	44	37
System 24	DIST	2019-06-19	LEAD	LSL	1	1	0
System 24	DIST	2019-07-23	LEAD	LSL	4	5	1
System 26	DIST	2019-08-13	LEAD	LSL	8.2	4.9	-3.3
System 26	DIST	2019-07-19	LEAD	LSL	0.6	2.8	2.2
System 26	DIST	2019-07-22	LEAD	LSL	1.2	1.3	0.1
System 26	DIST	2019-07-19	LEAD	LSL	2.2	2.1	-0.1
System 26	DIST	2019-07-19	LEAD	LSL	1.1	0.95	-0.15
System 26	DIST	2019-07-19	LEAD	LSL	2.8	9.9	7.1
System 26	DIST	2019-08-12	LEAD	LSL	3	6.6	3.6
System 26	DIST	2019-07-18	LEAD	LSL	0.8	7.5	6.7
System 26	DIST	2019-07-19	LEAD	LSL	2	3.1	1.1
System 26	DIST	2019-07-18	LEAD	LSL	3.8	15	11.2
System 26	DIST	2019-07-18	LEAD	LSL	2	3.6	1.6
System 26	DIST	2019-07-19	LEAD	LSL	5.3	6.9	1.6
System 26	DIST	2019-07-19	LEAD	LSL	6.6	3.7	-2.9
System 26	DIST	2019-07-19	LEAD	LSL	1.3	4.1	2.8
System 26	DIST	2019-07-18	LEAD	LSL	4.8	11	6.2
System 26	DIST	2019-07-19	LEAD	LSL	2.3	10	7.7
System 26	DIST	2019-08-09	LEAD	LSL	27	11	-16
System 26	DIST	2019-08-10	LEAD	LSL	8.5	17	8.5
System 26	DIST	2019-08-10	LEAD	LSL	1.1	3.8	2.7
System 26	DIST	2019-08-12	LEAD	LSL	6.12	2.43	-3.69
System 26	DIST	2019-08-12	LEAD	LSL	1.5	3.7	2.2
System 26	DIST	2019-08-14	LEAD	LSL	1.9	8.9	7
System 26	DIST	2019-08-14	LEAD	LSL	3.9	15	11.1
System 26	DIST	2019-08-12	LEAD	LSL	2.8	1.5	-1.3
System 26	DIST	2019-08-09	LEAD	LSL	5.4	10	4.6
System 26	DIST	2019-08-11	LEAD	LSL	2.2	5	2.8
System 26	DIST	2019-08-11	LEAD	LSL	2.5	3	0.5
System 26	DIST	2019-08-24	LEAD	LSL	0	0	0
System 26	DIST	2019-08-27	LEAD	LSL	0	0	0
System 26	DIST	2019-08-30	LEAD	LSL	0	0	0
System 26	DIST	2019-09-29	LEAD	LSL	6.3	10	3.7
System 26	DIST	2019-09-27	LEAD	LSL	8.8	19	10.2
System 26	DIST	2019-09-27	LEAD	LSL	4.2	8	3.8
System 26	DIST	2019-09-27	LEAD	LSL	7.9	4.5	-3.4
System 27	DIST	2019-06-12	LEAD	LSL	0	0	0
System 27	DIST	2019-06-13	LEAD	LSL	0	0	0
System 27	DIST	2019-06-12	LEAD	LSL	0	0	0
System 27	DIST	2019-06-14	LEAD	LSL	1.66	4.47	2.81
System 27	DIST	2019-06-14	LEAD	LSL	0	2.01	2.01
System 27	DIST	2019-06-16	LEAD	LSL	0	0	0
System 27	DIST	2019-06-18	LEAD	LSL	0	3.27	3.27
System 27	DIST	2019-06-17	LEAD	LSL	0	0	0
System 27	DIST	2019-06-19	LEAD	LSL	0	0	0
System 27	DIST	2019-06-22	LEAD	LSL	0	0	0
System 27	DIST	2019-06-27	LEAD	LSL	0	0	0
System 27	DIST	2019-07-01	LEAD	LSL	1.1	1.25	0.15
System 27	DIST	2019-07-02	LEAD	LSL	1.19	1.77	0.58
System 27	DIST	2019-07-12	LEAD	LSL	0	0	0
System 27	DIST	2019-07-12	LEAD	LSL	0	0	0
System 27	DIST	2019-07-12	LEAD	LSL	0	0	0
System 27	DIST	2019-07-15	LEAD	LSL	0	0	0
System 27	DIST	2019-07-19	LEAD	LSL	0	0	0
System 27	DIST	2019-07-22	LEAD	LSL	0	0	0
System 27	DIST	2019-07-29	LEAD	LSL	0	0	0
System 27	DIST	2019-08-05	LEAD	LSL	0	0	0
System 27	DIST	2019-08-13	LEAD	LSL	1.72	4.1	2.38
System 27	DIST	2019-08-08	LEAD	LSL	3.62	1.9	-1.72
System 27	DIST	2019-08-15	LEAD	LSL	1.66	2.15	0.49
System 27	DIST	2019-08-15	LEAD	LSL	0	0	0
System 27	DIST	2019-08-27	LEAD	LSL	0	0	0
System 27	DIST	2019-09-16	LEAD	LSL	0	0	0
System 27	DIST	2019-09-23	LEAD	LSL	2.01	8.31	6.3
System 27	DIST	2019-09-26	LEAD	LSL	0	0	0
System 27	DIST	2019-09-27	LEAD	LSL	0	0	0
System 28	DIST	2019-05-30	LEAD	LSL	0	0	0
System 28	DIST	2019-05-30	LEAD	LSL	3	3	0
System 28	DIST	2019-05-30	LEAD	LSL	4	5	1
System 28	DIST	2019-05-29	LEAD	LSL	2	0	-2
System 28	DIST	2019-05-30	LEAD	LSL	0	1	1
System 28	DIST	2019-05-29	LEAD	LSL	0	0	0
System 28	DIST	2019-06-03	LEAD	LSL	2	2	0
System 28	DIST	2019-05-31	LEAD	LSL	0	0	0
System 28	DIST	2019-05-31	LEAD	LSL	0	0	0
System 28	DIST	2019-06-02	LEAD	LSL	0	0	0
System 28	DIST	2019-09-17	LEAD	LSL	1	0	-1
System 28	DIST	2019-09-17	LEAD	LSL	0	0	0
System 28	DIST	2019-09-17	LEAD	LSL	7	3	-4
System 28	DIST	2019-09-17	LEAD	LSL	1	0	-1
System 28	DIST	2019-09-17	LEAD	LSL	0	0	0
System 28	DIST	2019-09-17	LEAD	LSL	1	0	-1
System 28	DIST	2019-09-16	LEAD	LSL	2	1	-1
System 28	DIST	2019-09-17	LEAD	LSL	0	0	0
System 28	DIST	2019-09-18	LEAD	LSL	2	0	-2
System 28	DIST	2019-09-18	LEAD	LSL	2	3	1
System 28	DIST	2019-09-18	LEAD	LSL	1	0	-1
System 28	DIST	2019-09-18	LEAD	LSL	0	0	0
System 28	DIST	2019-09-19	LEAD	LSL	1	1	0
System 28	DIST	2019-09-16	LEAD	LSL	4	2	-2
System 28	DIST	2019-09-18	LEAD	LSL	2	2	0
System 28	DIST	2019-09-20	LEAD	LSL	1	0	-1
System 28	DIST	2019-09-24	LEAD	LSL	2	2	0
System 28	DIST	2019-09-20	LEAD	LSL	1	0	-1
System 28	DIST	2019-10-01	LEAD	LSL	0	2	2
System 28	DIST	2019-10-16	LEAD	LSL	3	1	-2
System 29	DIST	2019-04-26	LEAD	LSL	0	0	0
System 29	DIST	2019-04-25	LEAD	LSL	0	0	0
System 29	DIST	2019-04-30	LEAD	LSL	0	0	0
System 29	DIST	2019-05-01	LEAD	LSL	0	0	0
System 29	DIST	2019-05-03	LEAD	LSL	0	0	0
System 29	DIST	2019-05-02	LEAD	LSL	1.04	0	-1.04
System 29	DIST	2019-05-03	LEAD	LSL	0	0	0
System 29	DIST	2019-05-04	LEAD	LSL	0	0	0
System 29	DIST	2019-05-08	LEAD	LSL	0	0	0
System 29	DIST	2019-05-07	LEAD	LSL	0	0	0
System 29	DIST	2019-05-12	LEAD	LSL	0	0	0
System 29	DIST	2019-05-16	LEAD	LSL	0	0	0
System 29	DIST	2019-05-16	LEAD	LSL	0	0	0
System 29	DIST	2019-05-14	LEAD	LSL	0	0	0
System 29	DIST	2019-05-14	LEAD	LSL	0	0	0
System 29	DIST	2019-05-15	LEAD	LSL	0	0	0
System 29	DIST	2019-05-14	LEAD	LSL	0	0	0
System 29	DIST	2019-05-14	LEAD	LSL	0	0	0
System 29	DIST	2019-05-14	LEAD	LSL	0
System 29	DIST	2019-05-15	LEAD	LSL		0
System 29	DIST	2019-05-15	LEAD	LSL	0	0	0
System 29	DIST	2019-05-16	LEAD	LSL	0	0	0
System 29	DIST	2019-05-11	LEAD	LSL	0	0	0
System 29	DIST	2019-05-17	LEAD	LSL	0	0	0
System 29	DIST	2019-05-16	LEAD	LSL	0	0	0
System 29	DIST	2019-05-17	LEAD	LSL	0	0	0
System 29	DIST	2019-05-17	LEAD	LSL	0	0	0
System 29	DIST	2019-05-16	LEAD	LSL	0	0	0
System 29	DIST	2019-05-16	LEAD	LSL	0	0	0
System 29	DIST	2019-05-17	LEAD	LSL	0	0	0
System 29	DIST	2019-05-31	LEAD	LSL	0	0	0
System 29	DIST	2019-05-30	LEAD	LSL	0	0	0
System 29	DIST	2019-05-31	LEAD	LSL	0	0	0
System 29	DIST	2019-05-30	LEAD	LSL	0	0	0
System 29	DIST	2019-06-01	LEAD	LSL	0	0	0
System 29	DIST	2019-06-01	LEAD	LSL	0	0	0
System 29	DIST	2019-06-05	LEAD	LSL	0	0	0
System 29	DIST	2019-06-06	LEAD	LSL	0	0	0
System 29	DIST	2019-06-09	LEAD	LSL	0	0	0
System 29	DIST	2019-06-05	LEAD	LSL	0	0	0
System 29	DIST	2019-06-06	LEAD	LSL	0	0	0
System 29	DIST	2019-06-07	LEAD	LSL	0	0	0
System 29	DIST	2019-06-07	LEAD	LSL	0	0	0
System 29	DIST	2019-06-07	LEAD	LSL	0	3.4	3.4
System 29	DIST	2019-06-11	LEAD	LSL	0	0	0
System 29	DIST	2019-06-14	LEAD	LSL	0	0	0
System 29	DIST	2019-06-17	LEAD	LSL	0	0	0
System 29	DIST	2019-06-17	LEAD	LSL	0	0	0
System 29	DIST	2019-06-17	LEAD	LSL	0	0	0
System 29	DIST	2019-06-17	LEAD	LSL	0	0	0
System 29	DIST	2019-06-17	LEAD	LSL	0	0	0
System 29	DIST	2019-07-17	LEAD	LSL	0	0	0
System 29	DIST	2019-07-10	LEAD	LSL	0	0	0
System 29	DIST	2019-07-10	LEAD	LSL	0	0	0
System 29	DIST	2019-07-09	LEAD	LSL	1.98	0	-1.98
System 29	DIST	2019-07-10	LEAD	LSL	0	0	0
System 29	DIST	2019-07-17	LEAD	LSL	0	0	0
System 29	DIST	2019-07-17	LEAD	LSL	0	0	0
System 29	DIST	2019-07-17	LEAD	LSL	0	0	0
System 29	DIST	2019-07-17	LEAD	LSL	0	0	0
System 29	DIST	2019-07-17	LEAD	LSL	0	0	0
System 29	DIST	2019-07-09	LEAD	LSL	0	0	0
System 29	DIST	2019-07-08	LEAD	LSL	0	0	0
System 29	DIST	2019-07-15	LEAD	LSL	0	0	0
System 29	DIST	2019-07-15	LEAD	LSL	0	0	0
System 29	DIST	2019-07-11	LEAD	LSL	0	0	0
System 29	DIST	2019-07-09	LEAD	LSL	0	0	0
System 29	DIST	2019-07-18	LEAD	LSL	0	0	0
System 29	DIST	2019-07-23	LEAD	LSL	0	0	0
System 29	DIST	2019-07-25	LEAD	LSL	1.19	2.28	1.09
System 29	DIST	2019-07-30	LEAD	LSL	0	0	0
System 29	DIST	2019-07-24	LEAD	LSL	0	0	0
System 29	DIST	2019-07-24	LEAD	LSL	1.2	0	-1.2
System 29	DIST	2019-07-23	LEAD	LSL	0	0	0
System 29	DIST	2019-07-20	LEAD	LSL	0	0	0
System 29	DIST	2019-07-22	LEAD	LSL	0	0	0
System 29	DIST	2019-07-19	LEAD	LSL	0	0	0
System 29	DIST	2019-07-20	LEAD	LSL	0	0	0
System 29	DIST	2019-07-24	LEAD	LSL	0	0	0
System 29	DIST	2019-07-22	LEAD	LSL	0	0	0
System 29	DIST	2019-07-23	LEAD	LSL	0	0	0
System 29	DIST	2019-07-24	LEAD	LSL	0	0	0
System 29	DIST	2019-07-25	LEAD	LSL	0	0	0
System 29	DIST	2019-07-25	LEAD	LSL	0	0	0
System 29	DIST	2019-07-27	LEAD	LSL	0	0	0
System 29	DIST	2019-07-23	LEAD	LSL	0	0	0
System 29	DIST	2019-07-23	LEAD	LSL	0	0	0
System 29	DIST	2019-07-23	LEAD	LSL	0	0	0
System 29	DIST	2019-07-23	LEAD	LSL	0	0	0
System 29	DIST	2019-07-23	LEAD	LSL	1.03	1.72	0.69
System 29	DIST	2019-08-13	LEAD	LSL	0	0	0
System 29	DIST	2019-08-08	LEAD	LSL	0	0	0
System 29	DIST	2019-08-16	LEAD	LSL	0	0	0
System 29	DIST	2019-08-02	LEAD	LSL	0	0	0
System 29	DIST	2019-07-31	LEAD	LSL	0	0	0
System 29	DIST	2019-08-20	LEAD	LSL	0	0	0
System 31	DIST	2019-08-06	LEAD	LSL	0	0	0
System 31	DIST	2019-08-14	LEAD	LSL	0	0	0
System 31	DIST	2019-08-06	LEAD	LSL	0	0	0
System 31	DIST	2019-08-07	LEAD	LSL	2.94	6.41	3.47
System 31	DIST	2019-08-06	LEAD	LSL	0	0	0
System 31	DIST	2019-08-01	LEAD	LSL	0	0	0
System 31	DIST	2019-08-02	LEAD	LSL	0	0	0
System 31	DIST	2019-08-02	LEAD	LSL	0	0	0
System 31	DIST	2019-08-01	LEAD	LSL	5.04	0	-5.04
System 31	DIST	2019-08-02	LEAD	LSL	0	0	0
System 31	DIST	2019-08-01	LEAD	LSL	0	0	0
System 31	DIST	2019-08-01	LEAD	LSL	0	0	0
System 31	DIST	2019-08-01	LEAD	LSL	0	0	0
System 31	DIST	2019-08-16	LEAD	LSL	0	0	0
System 31	DIST	2019-08-13	LEAD	LSL	4.23	2.45	-1.78
System 31	DIST	2019-08-06	LEAD	LSL	0	0	0
System 31	DIST	2019-08-19	LEAD	LSL	2.56	2.94	0.38
System 31	DIST	2019-08-13	LEAD	LSL	0	2.21	2.21
System 31	DIST	2019-08-06	LEAD	LSL	0	0	0
System 31	DIST	2019-08-16	LEAD	LSL	0	0	0
System 31	DIST	2019-08-07	LEAD	LSL	0	0	0
System 31	DIST	2019-08-16	LEAD	LSL	0	9.74	9.74
System 33	DIST	2019-06-11	LEAD	LSL	2	0	-2
System 33	DIST	2019-06-13	LEAD	LSL	0	0	0
System 33	DIST	2019-06-11	LEAD	LSL	0	2	2
System 33	DIST	2019-06-12	LEAD	LSL	0	0	0
System 33	DIST	2019-06-11	LEAD	LSL	0	0	0
System 33	DIST	2019-06-12	LEAD	LSL	0	0	0
System 33	DIST	2019-06-12	LEAD	LSL	0	0	0
System 33	DIST	2019-06-12	LEAD	LSL	0	0	0
System 33	DIST	2019-06-11	LEAD	LSL	0	0	0
System 33	DIST	2019-06-11	LEAD	LSL	0	0	0
System 33	DIST	2019-06-13	LEAD	LSL	1	1	0
System 33	DIST	2019-06-12	LEAD	LSL	0	0	0
System 33	DIST	2019-06-12	LEAD	LSL	0	0	0
System 33	DIST	2019-06-12	LEAD	LSL	1	0	-1
System 33	DIST	2019-06-12	LEAD	LSL	0	0	0
System 33	DIST	2019-06-18	LEAD	LSL	0	0	0
System 33	DIST	2019-06-17	LEAD	LSL	0	0	0
System 33	DIST	2019-06-20	LEAD	LSL	0	0	0
System 33	DIST	2019-06-14	LEAD	LSL	3	3	0
System 33	DIST	2019-06-17	LEAD	LSL	0	0	0
System 33	DIST	2019-06-19	LEAD	LSL	2	2	0
System 33	DIST	2019-06-17	LEAD	LSL	0	1	1
System 33	DIST	2019-06-18	LEAD	LSL	0	0	0
System 33	DIST	2019-06-18	LEAD	LSL	0	0	0
System 33	DIST	2019-06-17	LEAD	LSL	0	0	0
System 33	DIST	2019-06-26	LEAD	LSL	1	0	-1
System 33	DIST	2019-06-27	LEAD	LSL	2	1	-1
System 33	DIST	2019-06-26	LEAD	LSL	0	0	0
System 33	DIST	2019-06-20	LEAD	LSL	1	0	-1
System 33	DIST	2019-06-21	LEAD	LSL	0	0	0
System 33	DIST	2019-06-27	LEAD	LSL	0	2	2
System 33	DIST	2019-07-08	LEAD	LSL	0	0	0
System 34	DIST	2019-05-01	LEAD	LSL	5.7	14	8.3
System 34	DIST	2019-05-01	LEAD	LSL	2.6	19	16.4
System 34	DIST	2019-05-01	LEAD	LSL	1.7	1.3	-0.4
System 34	DIST	2019-05-01	LEAD	LSL	0	0	0
System 34	DIST	2019-05-01	LEAD	LSL	2.9	12	9.1
System 34	DIST	2019-04-29	LEAD	LSL	0	0	0
System 34	DIST	2019-05-01	LEAD	LSL	1.3	1.6	0.3
System 34	DIST	2019-05-01	LEAD	LSL	0	0	0
System 34	DIST	2019-05-01	LEAD	LSL	3.8	11	7.2
System 34	DIST	2019-04-30	LEAD	LSL	0	0	0
System 34	DIST	2019-04-30	LEAD	LSL	4.8	0	-4.8
System 34	DIST	2019-05-01	LEAD	LSL	0	0	0
System 34	DIST	2019-05-01	LEAD	LSL	2.1	8.1	6
System 34	DIST	2019-05-01	LEAD	LSL	0	0	0
System 34	DIST	2019-04-30	LEAD	LSL	13	17	4
System 34	DIST	2019-05-01	LEAD	LSL	2	9.8	7.8
System 34	DIST	2019-05-01	LEAD	LSL	0	2.8	2.8
System 34	DIST	2019-05-01	LEAD	LSL	0	1.8	1.8
System 34	DIST	2019-05-01	LEAD	LSL	1.6	11	9.4
System 34	DIST	2019-05-01	LEAD	LSL	0	0	0
System 34	DIST	2019-04-29	LEAD	LSL	0	12	12
System 34	DIST	2019-05-01	LEAD	LSL	1.5	4.6	3.1
System 34	DIST	2019-04-30	LEAD	LSL	4.3	9.1	4.8
System 34	DIST	2019-04-30	LEAD	LSL	0	2.6	2.6
System 34	DIST	2019-04-30	LEAD	LSL	10	3.5	-6.5
System 34	DIST	2019-05-01	LEAD	LSL	0	3.1	3.1
System 34	DIST	2019-05-01	LEAD	LSL	2	2.4	0.4
System 34	DIST	2019-05-01	LEAD	LSL	2.4	14	11.6
System 34	DIST	2019-04-30	LEAD	LSL	0	3.5	3.5
System 34	DIST	2019-04-30	LEAD	LSL	3.7	6.3	2.6
System 34	DIST	2019-05-01	LEAD	LSL	1.3	4.6	3.3
System 34	DIST	2019-04-29	LEAD	LSL	1.1	3.2	2.1
System 34	DIST	2019-05-02	LEAD	LSL	2	1.8	-0.2
System 34	DIST	2019-05-01	LEAD	LSL	0	5.6	5.6
System 34	DIST	2019-04-30	LEAD	LSL	1.4	3.4	2
System 34	DIST	2019-05-02	LEAD	LSL	0	0	0
System 34	DIST	2019-04-30	LEAD	LSL	2.1	10	7.9
System 34	DIST	2019-05-01	LEAD	LSL	1.4	1.5	0.1
System 34	DIST	2019-04-29	LEAD	LSL	28	14	-14
System 34	DIST	2019-04-30	LEAD	LSL	3.6	1.1	-2.5
System 34	DIST	2019-10-30	LEAD	LSL	6.6	15	8.4
System 34	DIST	2019-10-30	LEAD	LSL	2.3	3.5	1.2
System 34	DIST	2019-10-30	LEAD	LSL	2.1	0	-2.1
System 34	DIST	2019-10-29	LEAD	LSL	0	0	0
System 34	DIST	2019-10-30	LEAD	LSL	1.4	1.4	0
System 34	DIST	2019-10-30	LEAD	LSL	1.6	11	9.4
System 34	DIST	2019-10-29	LEAD	LSL	1.5	1.1	-0.4
System 34	DIST	2019-10-30	LEAD	LSL	3.7	12	8.3
System 34	DIST	2019-10-29	LEAD	LSL	0	0	0
System 34	DIST	2019-10-29	LEAD	LSL	20	9.2	-10.8
System 34	DIST	2019-10-30	LEAD	LSL	6.6	9.2	2.6
System 34	DIST	2019-10-30	LEAD	LSL	0	0	0
System 34	DIST	2019-10-29	LEAD	LSL	1.6	19	17.4
System 34	DIST	2019-10-30	LEAD	LSL	5.1	5.6	0.5
System 34	DIST	2019-10-30	LEAD	LSL	2	5.6	3.6
System 34	DIST	2019-10-30	LEAD	LSL	2.9	2.4	-0.5
System 34	DIST	2019-10-30	LEAD	LSL	4.2	16	11.8
System 34	DIST	2019-10-31	LEAD	LSL	0	0	0
System 34	DIST	2019-10-30	LEAD	LSL	3.7	24	20.3
System 34	DIST	2019-10-30	LEAD	LSL	2.1	2.5	0.4
System 34	DIST	2019-10-31	LEAD	LSL	9.1	5.5	-3.6
System 34	DIST	2019-10-30	LEAD	LSL	1.8	3.6	1.8
System 34	DIST	2019-10-30	LEAD	LSL	6.4	19	12.6
System 34	DIST	2019-10-30	LEAD	LSL	2.1	12	9.9
System 34	DIST	2019-10-29	LEAD	LSL	2.3	4.3	2
System 34	DIST	2019-10-30	LEAD	LSL	3.9	2.2	-1.7
System 34	DIST	2019-10-29	LEAD	LSL	2.9	8.3	5.4
System 34	DIST	2019-10-30	LEAD	LSL	7	14	7
System 34	DIST	2019-10-29	LEAD	LSL	29	5.1	-23.9
System 34	DIST	2019-10-29	LEAD	LSL	2.5	6.9	4.4
System 34	DIST	2019-10-31	LEAD	LSL	4	7	3
System 34	DIST	2019-10-30	LEAD	LSL	1.2	1.1	-0.1
System 34	DIST	2019-11-01	LEAD	LSL	0	0	0
System 34	DIST	2019-10-30	LEAD	LSL	3.1	2.5	-0.6
System 34	DIST	2019-10-30	LEAD	LSL	2.5	7	4.5
System 34	DIST	2019-10-30	LEAD	LSL	1.2	3	1.8
System 34	DIST	2019-10-31	LEAD	LSL	12	1.3	-10.7
System 34	DIST	2019-10-31	LEAD	LSL	1	1.1	0.1
System 34	DIST	2019-10-31	LEAD	LSL	2.8	12	9.2
System 34	DIST	2019-10-31	LEAD	LSL	100	30	-70
System 37	DIST	2019-08-02	LEAD	LSL	4.1	8.6	4.5
System 37	DIST	2019-07-31	LEAD	LSL	24	17	-7
System 37	DIST	2019-08-05	LEAD	LSL	2.4	19	16.6
System 37	DIST	2019-07-30	LEAD	LSL	1.8	2	0.2
System 37	DIST	2019-07-31	LEAD	LSL	8.6	4	-4.6
System 37	DIST	2019-07-30	LEAD	LSL	5.5	11	5.5
System 37	DIST	2019-07-25	LEAD	LSL	3.9	15	11.1
System 37	DIST	2019-08-08	LEAD	LSL	1.7	6.2	4.5
System 37	DIST	2019-08-08	LEAD	LSL	11	14	3
System 37	DIST	2019-08-08	LEAD	LSL	2.7	3.3	0.6
System 37	DIST	2019-08-11	LEAD	LSL	2.5	6.7	4.2
System 37	DIST	2019-08-10	LEAD	LSL	3.9	5.6	1.7
System 37	DIST	2019-08-12	LEAD	LSL	1	1.2	0.2
System 37	DIST	2019-08-11	LEAD	LSL	4.9	13	8.1
System 37	DIST	2019-08-13	LEAD	LSL	3.2	6.8	3.6
System 37	DIST	2019-08-11	LEAD	LSL	1.3	1.2	-0.1
System 37	DIST	2019-08-14	LEAD	LSL	0	6.9	6.9
System 37	DIST	2019-08-07	LEAD	LSL	17	16	-1
System 37	DIST	2019-08-07	LEAD	LSL	0	0	0
System 37	DIST	2019-08-07	LEAD	LSL	2.5	1.8	-0.7
System 37	DIST	2019-08-08	LEAD	LSL	2.4	1.2	-1.2
System 37	DIST	2019-08-07	LEAD	LSL	3.1	3.5	0.4
System 37	DIST	2019-08-13	LEAD	LSL	1.6	3.5	1.9
System 37	DIST	2019-08-13	LEAD	LSL	1.8	1.4	-0.4
System 37	DIST	2019-08-12	LEAD	LSL	0	0	0
System 37	DIST	2019-08-20	LEAD	LSL	1.1	0	-1.1
System 37	DIST	2019-08-20	LEAD	LSL	2	2.1	0.1
System 37	DIST	2019-08-20	LEAD	LSL	0	1.6	1.6
System 37	DIST	2019-08-22	LEAD	LSL	1.2	1	-0.2
System 37	DIST	2019-08-21	LEAD	LSL	3.3	2.9	-0.4
System 38	DIST	2019-07-10	LEAD	LSL	2	1.5	-0.5
System 38	DIST	2019-07-12	LEAD	LSL	1.1	1.2	0.1
System 38	DIST	2019-07-19	LEAD	LSL	0	0.3	0.3
System 38	DIST	2019-07-19	LEAD	LSL	0.89	0.51	-0.38
System 38	DIST	2019-07-10	LEAD	LSL	1.2	1.2	0
System 38	DIST	2019-07-11	LEAD	LSL	0.54	4.3	3.76
System 38	DIST	2019-07-11	LEAD	LSL	0.51	0.59	0.08
System 38	DIST	2019-07-11	LEAD	LSL	0.59	1.3	0.71
System 38	DIST	2019-07-12	LEAD	LSL	0	0.24	0.24
System 38	DIST	2019-07-09	LEAD	LSL	0.93	0	-0.93
System 38	DIST	2019-07-10	LEAD	LSL	0.3	0.72	0.42
System 38	DIST	2019-07-10	LEAD	LSL	0.58	0	-0.58
System 38	DIST	2019-07-10	LEAD	LSL	0.54	0.84	0.3
System 38	DIST	2019-07-10	LEAD	LSL	1.6	4.9	3.3
System 38	DIST	2019-07-09	LEAD	LSL	0.56	0.23	-0.33
System 38	DIST	2019-07-09	LEAD	LSL	0	0	0
System 38	DIST	2019-07-09	LEAD	LSL	0	0	0
System 38	DIST	2019-07-09	LEAD	LSL	0.55	0	-0.55
System 38	DIST	2019-07-09	LEAD	LSL	0.54	0	-0.54
System 38	DIST	2019-07-10	LEAD	LSL	0.91	0	-0.91
System 40	DIST	2019-09-06	LEAD	LSL	3.22	10.55	7.33
System 40	DIST	2019-08-28	LEAD	LSL	0	0	0
System 40	DIST	2019-08-29	LEAD	LSL	0	3.28	3.28
System 40	DIST	2019-08-29	LEAD	LSL	0	0	0
System 40	DIST	2019-09-06	LEAD	LSL	4.77	16.16	11.39
System 40	DIST	2019-09-03	LEAD	LSL	9.74	5.34	-4.4
System 40	DIST	2019-09-06	LEAD	LSL	0	4.94	4.94
System 40	DIST	2019-09-06	LEAD	LSL	5.1	11.34	6.24
System 40	DIST	2019-08-27	LEAD	LSL	0	5.75	5.75
System 40	DIST	2019-08-29	LEAD	LSL	3.62	4.4	0.78
System 40	DIST	2019-08-22	LEAD	LSL	1.1	4.7	3.6
System 40	DIST	2019-08-29	LEAD	LSL	0	12.39	12.39
System 40	DIST	2019-08-22	LEAD	LSL	3.1	17	13.9
System 40	DIST	2019-08-22	LEAD	LSL	1.2	6.6	5.4
System 40	DIST	2019-08-22	LEAD	LSL	2.6	11	8.4
System 40	DIST	2019-08-22	LEAD	LSL	1.6	4.8	3.2
System 40	DIST	2019-09-02	LEAD	LSL	16.05	24.36	8.31
System 40	DIST	2019-08-21	LEAD	LSL	13	40	27
System 40	DIST	2019-08-27	LEAD	LSL	4.61	27.64	23.03
System 40	DIST	2019-09-06	LEAD	LSL	4.46	5.84	1.38
System 40	DIST	2019-08-27	LEAD	LSL	3.29	25.68	22.39
System 40	DIST	2019-09-03	LEAD	LSL	0	13.63	13.63
System 40	DIST	2019-08-27	LEAD	LSL	2.12	5.87	3.75
System 40	DIST	2019-09-03	LEAD	LSL	47.39	2.53	-44.86
System 40	DIST	2019-08-28	LEAD	LSL	0	0	0
System 40	DIST	2019-08-29	LEAD	LSL	0	0	0
System 40	DIST	2019-09-04	LEAD	LSL	4.65	11.24	6.59
System 40	DIST	2019-08-29	LEAD	LSL	0	0	0
System 40	DIST	2019-09-04	LEAD	LSL	2.25	0	-2.25
System 40	DIST	2019-09-05	LEAD	LSL	0	2.17	2.17
System 40	DIST	2019-09-09	LEAD	LSL	5.6	19.67	14.07
System 42	DIST	2019-07-22	LEAD	LSL	0	0	0
System 42	DIST	2019-07-23	LEAD	LSL	0	0	0
System 42	DIST	2019-07-23	LEAD	LSL	0	0	0
System 42	DIST	2019-07-23	LEAD	LSL	3	0	-3
System 42	DIST	2019-07-23	LEAD	LSL	0	0	0
System 42	DIST	2019-07-23	LEAD	LSL	0	0	0
System 42	DIST	2019-07-24	LEAD	LSL	0	0	0
System 42	DIST	2019-07-24	LEAD	LSL	0	0	0
System 42	DIST	2019-07-23	LEAD	LSL	0	0	0
System 42	DIST	2019-07-25	LEAD	LSL	0	0	0
System 42	DIST	2019-07-30	LEAD	LSL	0	0	0
System 42	DIST	2019-08-05	LEAD	LSL	0	0	0
System 42	DIST	2019-08-06	LEAD	LSL	0	0	0
System 42	DIST	2019-08-07	LEAD	LSL	0	0	0
System 42	DIST	2019-08-07	LEAD	LSL	0	0	0
System 42	DIST	2019-08-20	LEAD	LSL	0	0	0
System 42	DIST	2019-08-20	LEAD	LSL	0	0	0
System 42	DIST	2019-08-20	LEAD	LSL	0	0	0
System 42	DIST	2019-08-20	LEAD	LSL	0	0	0
System 42	DIST	2019-08-20	LEAD	LSL	0	0	0
System 43	DIST	2019-07-23	LEAD	LSL	0	0	0
System 43	DIST	2019-07-23	LEAD	LSL	0	0	0
System 43	DIST	2019-07-23	LEAD	LSL	0	0	0
System 43	DIST	2019-07-24	LEAD	LSL	0	0	0
System 43	DIST	2019-07-23	LEAD	LSL	0	0	0
System 43	DIST	2019-07-23	LEAD	LSL	0	0	0
System 43	DIST	2019-07-23	LEAD	LSL	2.04	0	-2.04
System 43	DIST	2019-07-23	LEAD	LSL	0	0	0
System 43	DIST	2019-07-23	LEAD	LSL	0	0	0
System 43	DIST	2019-07-23	LEAD	LSL	0	0	0
System 43	DIST	2019-07-23	LEAD	LSL	0	0	0
System 43	DIST	2019-07-23	LEAD	LSL	0	0	0
System 43	DIST	2019-07-23	LEAD	LSL	0	0	0
System 43	DIST	2019-07-23	LEAD	LSL	0	0	0
System 43	DIST	2019-07-23	LEAD	LSL	0	1.88	1.88
System 43	DIST	2019-07-23	LEAD	LSL	0	0	0
System 43	DIST	2019-07-23	LEAD	LSL	0	0	0
System 43	DIST	2019-07-23	LEAD	LSL	0	0	0
System 43	DIST	2019-07-23	LEAD	LSL	1.28	0	-1.28
System 43	DIST	2019-07-23	LEAD	LSL	0	0	0
System 43	DIST	2019-07-23	LEAD	LSL	0	0	0
System 43	DIST	2019-07-23	LEAD	LSL	0	0	0
System 43	DIST	2019-07-23	LEAD	LSL	0	0	0
System 43	DIST	2019-07-23	LEAD	LSL	0	0	0
System 43	DIST	2019-07-23	LEAD	LSL	1.47	0	-1.47
System 43	DIST	2019-07-23	LEAD	LSL	0	0	0
System 43	DIST	2019-07-23	LEAD	LSL	0	0	0
System 43	DIST	2019-07-23	LEAD	LSL	2.75	0	-2.75
System 43	DIST	2019-07-23	LEAD	LSL	0	0	0
System 43	DIST	2019-07-23	LEAD	LSL	0	0	0
System 43	DIST	2019-07-24	LEAD	LSL	0	0	0
System 43	DIST	2019-07-24	LEAD	LSL	0	0	0
System 43	DIST	2019-07-23	LEAD	LSL	1.25	0	-1.25
System 43	DIST	2019-07-23	LEAD	LSL	1.02	0	-1.02
System 43	DIST	2019-07-24	LEAD	LSL	0	0	0
System 44	DIST	2019-06-04	LEAD	LSL	1.26	2.54	1.28
System 44	DIST	2019-06-04	LEAD	LSL	1.41	1.97	0.56
System 44	DIST	2019-06-04	LEAD	LSL	1.3	0	-1.3
System 44	DIST	2019-06-04	LEAD	LSL	1.26	2.98	1.72
System 44	DIST	2019-06-04	LEAD	LSL	1.08	5.44	4.36
System 44	DIST	2019-06-03	LEAD	LSL	0	2.62	2.62
System 44	DIST	2019-06-03	LEAD	LSL	0	3.3	3.3
System 44	DIST	2019-06-03	LEAD	LSL	1.24	8.79	7.55
System 44	DIST	2019-06-04	LEAD	LSL	1.63	3.51	1.88
System 44	DIST	2019-06-04	LEAD	LSL	0	1.32	1.32
System 44	DIST	2019-06-06	LEAD	LSL	0	0	0
System 44	DIST	2019-06-07	LEAD	LSL	0	1.64	1.64
System 44	DIST	2019-06-05	LEAD	LSL	4.19	2.23	-1.96
System 44	DIST	2019-06-05	LEAD	LSL	0	1.15	1.15
System 44	DIST	2019-06-05	LEAD	LSL	1.05	1.72	0.67
System 44	DIST	2019-06-05	LEAD	LSL	0	0	0
System 44	DIST	2019-06-05	LEAD	LSL	1.48	2.67	1.19
System 44	DIST	2019-06-05	LEAD	LSL	1.16	6.38	5.22
System 44	DIST	2019-06-12	LEAD	LSL	0	0	0
System 44	DIST	2019-06-10	LEAD	LSL	0	2.22	2.22
System 44	DIST	2019-06-11	LEAD	LSL	0	2.69	2.69
System 44	DIST	2019-06-18	LEAD	LSL	0	1.11	1.11
System 44	DIST	2019-06-13	LEAD	LSL	0	0	0
System 44	DIST	2019-06-17	LEAD	LSL	0	0	0
System 44	DIST	2019-06-18	LEAD	LSL	1.23	6.47	5.24
System 44	DIST	2019-06-18	LEAD	LSL	0	0	0
System 44	DIST	2019-06-20	LEAD	LSL	0	1.54	1.54
System 44	DIST	2019-06-24	LEAD	LSL	0	1.42	1.42
System 44	DIST	2019-07-01	LEAD	LSL	2.67	6.04	3.37
System 44	DIST	2019-06-27	LEAD	LSL	1.35	2.43	1.08
System 44	DIST	2019-06-27	LEAD	LSL	0	1.19	1.19
System 44	DIST	2019-07-15	LEAD	LSL	1.61	3.71	2.1
System 44	DIST	2019-07-15	LEAD	LSL	0	0	0
System 44	DIST	2019-07-17	LEAD	LSL	0	0	0
System 44	DIST	2019-07-16	LEAD	LSL	0	1.59	1.59
System 44	DIST	2019-07-24	LEAD	LSL	0	1.16	1.16
System 44	DIST	2019-08-05	LEAD	LSL	0	0	0
System 44	DIST	2019-08-07	LEAD	LSL	1.96	7	5.04
System 44	DIST	2019-08-08	LEAD	LSL	3.23	4.65	1.42
System 44	DIST	2019-08-08	LEAD	LSL	1.15	5.75	4.6
System 44	DIST	2019-08-08	LEAD	LSL	1.22	4.36	3.14
System 44	DIST	2019-08-08	LEAD	LSL	1.01	1.8	0.79
System 44	DIST	2019-08-15	LEAD	LSL	4.62	7.59	2.97
System 44	DIST	2019-08-15	LEAD	LSL	2.56	3.34	0.78
System 44	DIST	2019-08-14	LEAD	LSL	1.47	1.91	0.44
System 44	DIST	2019-08-20	LEAD	LSL	1.49	3.49	2
System 44	DIST	2019-08-21	LEAD	LSL	2.37	3.99	1.62
System 44	DIST	2019-08-21	LEAD	LSL	4.55	12.3	7.75
System 44	DIST	2019-08-22	LEAD	LSL	6.28	3.79	-2.49
System 44	DIST	2019-08-22	LEAD	LSL	2.29	5.64	3.35
System 44	DIST	2019-08-22	LEAD	LSL	3.07	8.64	5.57
System 44	DIST	2019-08-26	LEAD	LSL	1.89	1.22	-0.67
System 44	DIST	2019-08-27	LEAD	LSL	3.48	2.18	-1.3
System 46	DIST	2019-09-19	LEAD	LSL	2.1	9.1	7
System 46	DIST	2019-09-21	LEAD	LSL	1.3	3.1	1.8
System 46	DIST	2019-09-19	LEAD	LSL	1.3	3.5	2.2
System 46	DIST	2019-09-18	LEAD	LSL	1.1	1.4	0.3
System 46	DIST	2019-09-19	LEAD	LSL	1.1	0	-1.1
System 46	DIST	2019-09-19	LEAD	LSL	5.2	8.1	2.9
System 46	DIST	2019-09-18	LEAD	LSL	4.1	9.5	5.4
System 46	DIST	2019-09-23	LEAD	LSL	1.9	3.9	2
System 46	DIST	2019-09-21	LEAD	LSL	2	2.7	0.7
System 46	DIST	2019-09-21	LEAD	LSL	3.2	3.7	0.5
System 46	DIST	2019-09-18	LEAD	LSL	1.5	4	2.5
System 46	DIST	2019-09-18	LEAD	LSL	1.2	1.8	0.6
System 46	DIST	2019-09-19	LEAD	LSL	3.3	4.7	1.4
System 46	DIST	2019-09-23	LEAD	LSL	3.5	11	7.5
System 46	DIST	2019-09-24	LEAD	LSL	4.1	13	8.9
System 46	DIST	2019-09-25	LEAD	LSL	2.6	2.5	-0.1
System 46	DIST	2019-09-25	LEAD	LSL	3.5	5.2	1.7
System 46	DIST	2019-09-25	LEAD	LSL	0	1	1
System 46	DIST	2019-09-24	LEAD	LSL	1.6	1.5	-0.1
System 46	DIST	2019-09-24	LEAD	LSL	1.6	4.9	3.3
System 46	DIST	2019-09-24	LEAD	LSL	2.4	4.6	2.2
System 46	DIST	2019-09-24	LEAD	LSL	2.9	8.5	5.6
System 46	DIST	2019-09-24	LEAD	LSL	2.3	2.3	0
System 46	DIST	2019-09-25	LEAD	LSL	2.4	4.7	2.3
System 46	DIST	2019-09-24	LEAD	LSL	3.8	0	-3.8
System 46	DIST	2019-09-26	LEAD	LSL	0	1.5	1.5
System 46	DIST	2019-09-25	LEAD	LSL	1.5	1.3	-0.2
System 46	DIST	2019-09-24	LEAD	LSL	3.5	4.8	1.3
System 46	DIST	2019-09-27	LEAD	LSL	1.3	4.9	3.6
System 46	DIST	2019-09-26	LEAD	LSL	2.6	1.2	-1.4
System 48	DIST	2019-05-14	LEAD	LSL	3.9	33	29.1
System 48	DIST	2019-05-16	LEAD	LSL	0	0	0
System 48	DIST	2019-05-21	LEAD	LSL	8.4	7.9	-0.5
System 48	DIST	2019-05-15	LEAD	LSL	6.8	28	21.2
System 48	DIST	2019-05-14	LEAD	LSL	4.2	20	15.8
System 48	DIST	2019-05-14	LEAD	LSL	9.9	37	27.1
System 48	DIST	2019-05-14	LEAD	LSL	7.5	7.4	-0.1
System 48	DIST	2019-05-15	LEAD	LSL	0	2.6	2.6
System 48	DIST	2019-05-14	LEAD	LSL	2	4.7	2.7
System 48	DIST	2019-05-15	LEAD	LSL	10	2.8	-7.2
System 48	DIST	2019-05-20	LEAD	LSL	5.5	1.1	-4.4
System 48	DIST	2019-05-16	LEAD	LSL	5.2	5.8	0.6
System 48	DIST	2019-05-14	LEAD	LSL	7.4	12	4.6
System 48	DIST	2019-05-14	LEAD	LSL	18	9.4	-8.6
System 48	DIST	2019-05-14	LEAD	LSL	2.2	3.9	1.7
System 48	DIST	2019-05-14	LEAD	LSL	6.8	18	11.2
System 48	DIST	2019-05-14	LEAD	LSL	1.8	11	9.2
System 48	DIST	2019-05-17	LEAD	LSL	3.3	3.3	0
System 48	DIST	2019-05-14	LEAD	LSL	16	24	8
System 48	DIST	2019-05-14	LEAD	LSL	1.9	3.6	1.7
System 48	DIST	2019-10-16	LEAD	LSL	0	0	0
System 48	DIST	2019-10-22	LEAD	LSL	3.8	6.7	2.9
System 48	DIST	2019-10-15	LEAD	LSL	4.4	15	10.6
System 48	DIST	2019-10-17	LEAD	LSL	0	3	3
System 48	DIST	2019-10-16	LEAD	LSL	3	6.8	3.8
System 48	DIST	2019-10-17	LEAD	LSL	3.4	8.8	5.4
System 48	DIST	2019-10-17	LEAD	LSL	1.2	0	-1.2
System 48	DIST	2019-10-17	LEAD	LSL	4.9	5.6	0.7
System 48	DIST	2019-10-19	LEAD	LSL	2.8	2.3	-0.5
System 48	DIST	2019-10-17	LEAD	LSL	1.5	1.7	0.2
System 48	DIST	2019-10-17	LEAD	LSL	0	15	15
System 48	DIST	2019-10-17	LEAD	LSL	3.3	220	216.7
System 48	DIST	2019-10-17	LEAD	LSL	1.5	1.9	0.4
System 49	DIST	2019-11-22	LEAD	LSL	0	0	0
System 49	DIST	2019-11-20	LEAD	LSL	0	4.04	4.04
System 49	DIST	2019-05-20	LEAD	LSL	0	0	0
System 49	DIST	2019-06-26	LEAD	LSL	0	0	0
System 49	DIST	2019-10-07	LEAD	LSL	0	2.05	2.05
System 49	DIST	2019-06-26	LEAD	LSL	0	0	0
System 49	DIST	2019-10-23	LEAD	LSL	2.52	6.73	4.21
System 49	DIST	2019-06-26	LEAD	LSL	2.68	4.85	2.17
System 49	DIST	2019-06-02	LEAD	LSL	0	0	0
System 49	DIST	2019-06-27	LEAD	LSL	2.57	0	-2.57
System 49	DIST	2019-11-26	LEAD	LSL	2.24	4.09	1.85
System 49	DIST	2019-06-21	LEAD	LSL	0	2.1	2.1
System 49	DIST	2019-06-20	LEAD	LSL	2.43	0	-2.43
System 49	DIST	2019-05-20	LEAD	LSL	4.2	10.84	6.64
System 49	DIST	2019-10-01	LEAD	LSL	7.48	13.08	5.6
System 49	DIST	2019-05-20	LEAD	LSL	2.44	0	-2.44
System 49	DIST	2019-06-22	LEAD	LSL	5.66	7.87	2.21
System 49	DIST	2019-11-26	LEAD	LSL	3.42	2.33	-1.09
System 49	DIST	2019-06-22	LEAD	LSL	3.14	3.12	-0.02
System 49	DIST	2019-05-23	LEAD	LSL	6.41	7.22	0.81
System 49	DIST	2019-10-22	LEAD	LSL	7.98	8.73	0.75
System 49	DIST	2019-10-23	LEAD	LSL	4.91	3.97	-0.94
System 49	DIST	2019-06-24	LEAD	LSL	2.03	0	-2.03
System 49	DIST	2019-05-25	LEAD	LSL	0	0	0
System 49	DIST	2019-06-20	LEAD	LSL	0	0	0
System 49	DIST	2019-06-21	LEAD	LSL	0	2.39	2.39
System 49	DIST	2019-06-18	LEAD	LSL	0	4.3	4.3
System 49	DIST	2019-05-23	LEAD	LSL	2.83	2.92	0.09
System 49	DIST	2019-09-26	LEAD	LSL	2.53	4.68	2.15
System 49	DIST	2019-09-28	LEAD	LSL	14.42	21.81	7.39
System 49	DIST	2019-10-05	LEAD	LSL	5.1	2.63	-2.47
System 49	DIST	2019-11-18	LEAD	LSL	0	0	0
System 49	DIST	2019-06-20	LEAD	LSL	7.06	14.77	7.71
System 49	DIST	2019-06-14	LEAD	LSL	0	0	0
System 49	DIST	2019-12-02	LEAD	LSL	0	4.32	4.32
System 49	DIST	2019-06-22	LEAD	LSL	3.78	11.14	7.36
System 49	DIST	2019-09-27	LEAD	LSL	8.64	7.98	-0.66
System 49	DIST	2019-06-14	LEAD	LSL	5.35	4	-1.35
System 49	DIST	2019-06-11	LEAD	LSL	0	0	0
System 49	DIST	2019-06-13	LEAD	LSL	4.45	6.43	1.98
System 49	DIST	2019-05-21	LEAD	LSL	2.48	12.16	9.68
System 49	DIST	2019-11-04	LEAD	LSL	0	11.51	11.51
System 49	DIST	2019-10-31	LEAD	LSL	7.55	22.48	14.93
System 49	DIST	2019-06-17	LEAD	LSL	7.83	23.25	15.42
System 49	DIST	2019-10-24	LEAD	LSL	0	0	0
System 49	DIST	2019-06-07	LEAD	LSL	0	0	0
System 49	DIST	2019-06-06	LEAD	LSL	0	0	0
System 49	DIST	2019-06-07	LEAD	LSL	3.37	5.74	2.37
System 49	DIST	2019-10-24	LEAD	LSL	0	2.08	2.08
System 49	DIST	2019-06-07	LEAD	LSL	0	0	0
System 49	DIST	2019-06-18	LEAD	LSL	0	0	0
System 49	DIST	2019-05-25	LEAD	LSL	0	2.07	2.07
System 49	DIST	2019-10-05	LEAD	LSL	0	0	0
System 49	DIST	2019-05-22	LEAD	LSL	0	0	0
System 49	DIST	2019-12-07	LEAD	LSL	2.55	0	-2.55
System 49	DIST	2019-06-08	LEAD	LSL	0	0	0
System 49	DIST	2019-06-07	LEAD	LSL	0	0	0
System 49	DIST	2019-05-21	LEAD	LSL	3.89	5.14	1.25
System 49	DIST	2019-09-28	LEAD	LSL	4.47	4.03	-0.44
System 49	DIST	2019-06-06	LEAD	LSL	0	2.02	2.02
System 49	DIST	2019-06-04	LEAD	LSL	2.96	0	-2.96
System 49	DIST	2019-10-28	LEAD	LSL	0	0	0
System 49	DIST	2019-06-06	LEAD	LSL	0	0	0
System 49	DIST	2019-11-04	LEAD	LSL	0	0	0
System 49	DIST	2019-06-01	LEAD	LSL	0	0	0
System 49	DIST	2019-06-01	LEAD	LSL	2.29	2.33	0.04
System 49	DIST	2019-05-20	LEAD	LSL	0	2.7	2.7
System 49	DIST	2019-09-27	LEAD	LSL	5.48	7.16	1.68
System 49	DIST	2019-09-27	LEAD	LSL	7.07	19.38	12.31
System 49	DIST	2019-05-31	LEAD	LSL	3.95	9.03	5.08
System 49	DIST	2019-05-30	LEAD	LSL	6.68	7.98	1.3
System 49	DIST	2019-09-26	LEAD	LSL	13.53	14.61	1.08
System 49	DIST	2019-05-29	LEAD	LSL	2.08	3.1	1.02
System 49	DIST	2019-11-07	LEAD	LSL	2.57	4.04	1.47
System 49	DIST	2019-05-29	LEAD	LSL	0	12.15	12.15
System 49	DIST	2019-09-30	LEAD	LSL	3.81	19.75	15.94
System 49	DIST	2019-10-28	LEAD	LSL	4.26	3.24	-1.02
System 49	DIST	2019-06-13	LEAD	LSL	0	4.47	4.47
System 49	DIST	2019-12-07	LEAD	LSL	10.21	14.76	4.55
System 49	DIST	2019-05-29	LEAD	LSL	10.42	12.74	2.32
System 49	DIST	2019-11-15	LEAD	LSL	4.78	14.14	9.36
System 49	DIST	2019-06-21	LEAD	LSL	2.8	11.81	9.01
System 49	DIST	2019-05-29	LEAD	LSL	0	5.21	5.21
System 49	DIST	2019-05-25	LEAD	LSL	5.18	2.59	-2.59
System 49	DIST	2019-09-25	LEAD	LSL	0	0	0
System 49	DIST	2019-06-08	LEAD	LSL	2.83	2.17	-0.66
System 49	DIST	2019-05-29	LEAD	LSL	3	4.81	1.81
System 49	DIST	2019-05-25	LEAD	LSL	0	2.52	2.52
System 49	DIST	2019-09-26	LEAD	LSL	2.4	3.17	0.77
System 49	DIST	2019-06-12	LEAD	LSL	0	0	0
System 49	DIST	2019-11-14	LEAD	LSL	0	0	0
System 49	DIST	2019-06-21	LEAD	LSL	0	0	0
System 49	DIST	2019-11-27	LEAD	LSL	3.6	9.98	6.38
System 49	DIST	2019-12-03	LEAD	LSL	0	0	0
System 49	DIST	2019-12-07	LEAD	LSL	3.87	0	-3.87
System 49	DIST	2019-12-14	LEAD	LSL	3.88	2.29	-1.59
System 49	DIST	2019-12-11	LEAD	LSL	2.06	5.59	3.53
System 49	DIST	2019-12-10	LEAD	LSL	5.23	18	12.77
System 49	DIST	2019-12-17	LEAD	LSL	0	4.67	4.67
System 49	DIST	2019-12-14	LEAD	LSL	0	0	0
System 49	DIST	2019-12-14	LEAD	LSL	0	2.21	2.21
System 49	DIST	2019-12-14	LEAD	LSL	0	0	0
System 49	DIST	2019-12-26	LEAD	LSL	0	0	0
System 49	DIST	2019-12-16	LEAD	LSL	0	0	0
System 49	DIST	2019-12-21	LEAD	LSL	0	0	0
System 49	DIST	2019-12-21	LEAD	LSL	8.2	16.39	8.19
System 49	DIST	2019-12-27	LEAD	LSL	6.19	0	-6.19
System 49	DIST	2019-12-21	LEAD	LSL	8.48	8.81	0.33
System 49	DIST	2019-12-21	LEAD	LSL	0	0	0
System 49	DIST	2019-12-21	LEAD	LSL	4.09	2.29	-1.8
System 49	DIST	2019-12-23	LEAD	LSL	2.71	7.95	5.24
System 49	DIST	2019-12-26	LEAD	LSL	0	6.73	6.73
System 49	DIST	2019-12-21	LEAD	LSL	10.45	0	-10.45
System 49	DIST	2019-12-26	LEAD	LSL	2.54	4.54	2
System 49	DIST	2019-12-26	LEAD	LSL	0	5.46	5.46
System 49	DIST	2019-12-27	LEAD	LSL	0	0	0
System 49	DIST	2019-12-30	LEAD	LSL	0	2.5	2.5
System 49	DIST	2019-12-30	LEAD	LSL	2.05	2.43	0.38
System 49	DIST	2019-05-25	LEAD	LSL	7.61	3.15	-4.46
System 49	DIST	2019-05-30	LEAD	LSL	0	0	0
System 49	DIST	2019-05-29	LEAD	LSL	2.9	6.3	3.4
System 49	DIST	2019-05-30	LEAD	LSL	2.89	0	-2.89
System 49	DIST	2019-05-25	LEAD	LSL	0	0	0
System 50	DIST	2019-08-01	LEAD	LSL	72	21	-51
System 50	DIST	2019-08-07	LEAD	LSL	0	0	0
System 50	DIST	2019-08-13	LEAD	LSL	0	0	0
System 50	DIST	2019-08-09	LEAD	LSL	2.8	4.3	1.5
System 50	DIST	2019-08-13	LEAD	LSL	0	0	0
System 50	DIST	2019-08-23	LEAD	LSL	20.51	28.6	8.09
System 50	DIST	2019-08-29	LEAD	LSL	0	0	0
System 50	DIST	2019-08-15	LEAD	LSL	5.72	9.5	3.78
System 50	DIST	2019-08-24	LEAD	LSL	0	0	0
System 50	DIST	2019-08-28	LEAD	LSL	3.58	12.62	9.04
System 50	DIST	2019-08-25	LEAD	LSL	0	0	0
System 50	DIST	2019-08-23	LEAD	LSL	0	0	0
System 50	DIST	2019-08-27	LEAD	LSL	0	0	0
System 50	DIST	2019-08-23	LEAD	LSL	0	0	0
System 50	DIST	2019-08-23	LEAD	LSL	2.91	6.93	4.02
System 50	DIST	2019-08-22	LEAD	LSL	0	0	0
System 50	DIST	2019-08-22	LEAD	LSL	42	5	-37
System 50	DIST	2019-08-23	LEAD	LSL	2.23	5.92	3.69
System 50	DIST	2019-08-23	LEAD	LSL	19.54	6.74	-12.8
System 50	DIST	2019-08-29	LEAD	LSL	2.01	2.54	0.53
System 52	DIST	2019-09-19	LEAD	LSL	0	3	3
System 52	DIST	2019-09-19	LEAD	LSL	0	0	0
System 52	DIST	2019-09-19	LEAD	LSL	0	0	0
System 52	DIST	2019-09-18	LEAD	LSL	0	0	0
System 52	DIST	2019-09-10	LEAD	LSL	0	0	0
System 52	DIST	2019-09-18	LEAD	LSL	0	6	6
System 52	DIST	2019-09-11	LEAD	LSL	4	4	0
System 52	DIST	2019-09-11	LEAD	LSL	127	0	-127
System 52	DIST	2019-09-16	LEAD	LSL	0	0	0
System 52	DIST	2019-09-12	LEAD	LSL	2	1	-1
System 52	DIST	2019-09-16	LEAD	LSL	0	0	0
System 52	DIST	2019-09-17	LEAD	LSL	0	0	0
System 52	DIST	2019-09-16	LEAD	LSL	5	5	0
System 52	DIST	2019-09-17	LEAD	LSL	0	0	0
System 52	DIST	2019-09-20	LEAD	LSL	0	0	0
System 52	DIST	2019-09-24	LEAD	LSL	0	0	0
System 52	DIST	2019-09-26	LEAD	LSL	2	3	1
System 52	DIST	2019-09-26	LEAD	LSL	3	2	-1
System 52	DIST	2019-09-20	LEAD	LSL	0	0	0
System 52	DIST	2019-09-20	LEAD	LSL	2	6	4
System 53	DIST	2019-07-23	LEAD	LSL	2.1	9.6	7.5
System 53	DIST	2019-07-25	LEAD	LSL	3.3	16	12.7
System 53	DIST	2019-08-01	LEAD	LSL	0	2.25	2.25
System 53	DIST	2019-07-23	LEAD	LSL	9.3	5.8	-3.5
System 53	DIST	2019-07-23	LEAD	LSL	3.7	13	9.3
System 53	DIST	2019-07-25	LEAD	LSL	5	7.7	2.7
System 53	DIST	2019-07-22	LEAD	LSL	3.2	7.3	4.1
System 53	DIST	2019-07-23	LEAD	LSL	1.8	11	9.2
System 53	DIST	2019-07-22	LEAD	LSL	2.7	7.5	4.8
System 53	DIST	2019-07-22	LEAD	LSL	1.1	1.2	0.1
System 53	DIST	2019-07-22	LEAD	LSL	3.8	1.8	-2
System 53	DIST	2019-07-22	LEAD	LSL	1.8	6.2	4.4
System 53	DIST	2019-07-22	LEAD	LSL	3.2	5.6	2.4
System 53	DIST	2019-07-22	LEAD	LSL	3.4	12	8.6
System 53	DIST	2019-07-22	LEAD	LSL	3.1	7.8	4.7
System 53	DIST	2019-07-22	LEAD	LSL	4.6	18	13.4
System 53	DIST	2019-07-22	LEAD	LSL	0.7	1.8	1.1
System 53	DIST	2019-07-22	LEAD	LSL	2.9	5.1	2.2
System 53	DIST	2019-07-23	LEAD	LSL	1.3	10	8.7
System 53	DIST	2019-07-24	LEAD	LSL	1.2	1.3	0.1
System 53	DIST	2019-07-23	LEAD	LSL	1	7.2	6.2
System 53	DIST	2019-07-23	LEAD	LSL	2.7	9.9	7.2
System 53	DIST	2019-07-26	LEAD	LSL	0.64	0.78	0.14
System 53	DIST	2019-07-26	LEAD	LSL	5.5	6	0.5
System 53	DIST	2019-08-05	LEAD	LSL	3.84	6.25	2.41
System 53	DIST	2019-07-24	LEAD	LSL	2.9	14	11.1
System 53	DIST	2019-07-23	LEAD	LSL	4.8	6.5	1.7
System 53	DIST	2019-07-23	LEAD	LSL	1.4	6.1	4.7
System 53	DIST	2019-07-26	LEAD	LSL	3.9	28	24.1
System 53	DIST	2019-07-30	LEAD	LSL	1.6	4.7	3.1
System 53	DIST	2019-09-06	LEAD	LSL	100	30	-70
System 54	DIST	2019-07-09	LEAD	LSL	0	0	0
System 54	DIST	2019-07-11	LEAD	LSL	0	0	0
System 54	DIST	2019-07-16	LEAD	LSL	0	0	0
System 54	DIST	2019-07-16	LEAD	LSL	0	0	0
System 54	DIST	2019-07-19	LEAD	LSL	0	0	0
System 54	DIST	2019-07-26	LEAD	LSL	0	0	0
System 54	DIST	2019-07-29	LEAD	LSL	0	0	0
System 54	DIST	2019-07-26	LEAD	LSL	0	0	0
System 54	DIST	2019-08-03	LEAD	LSL	0	0	0
System 54	DIST	2019-08-09	LEAD	LSL	0	0	0
System 54	DIST	2019-08-17	LEAD	LSL	0	0	0
System 54	DIST	2019-08-26	LEAD	LSL	5	265	260
System 54	DIST	2019-08-29	LEAD	LSL	0	0	0
System 54	DIST	2019-09-01	LEAD	LSL	0	0	0
System 54	DIST	2019-09-02	LEAD	LSL	0	3	3
System 54	DIST	2019-09-03	LEAD	LSL	0	1	1
System 54	DIST	2019-09-03	LEAD	LSL	0	0	0
System 54	DIST	2019-09-05	LEAD	LSL	1	0	-1
System 54	DIST	2019-09-05	LEAD	LSL	0	0	0
System 54	DIST	2019-09-06	LEAD	LSL	0	1	1
System 55	DIST	2019-08-14	LEAD	LSL	0	0	0
System 55	DIST	2019-08-14	LEAD	LSL	0	0	0
System 55	DIST	2019-08-14	LEAD	LSL	0	0	0
System 55	DIST	2019-08-14	LEAD	LSL	0	1.7	1.7
System 55	DIST	2019-08-14	LEAD	LSL	0	0	0
System 55	DIST	2019-08-14	LEAD	LSL	1.32	0	-1.32
System 55	DIST	2019-08-14	LEAD	LSL	0	0	0
System 55	DIST	2019-08-14	LEAD	LSL	0	0	0
System 55	DIST	2019-08-14	LEAD	LSL	0	0	0
System 55	DIST	2019-08-14	LEAD	LSL	0	0	0
System 55	DIST	2019-08-14	LEAD	LSL	0	0	0
System 55	DIST	2019-08-14	LEAD	LSL	0	0	0
System 55	DIST	2019-08-14	LEAD	LSL	0	0	0
System 55	DIST	2019-08-14	LEAD	LSL	0	0	0
System 55	DIST	2019-08-14	LEAD	LSL	0	0	0
System 55	DIST	2019-08-14	LEAD	LSL	0	0	0
System 55	DIST	2019-08-14	LEAD	LSL	2.99	0	-2.99
System 55	DIST	2019-08-14	LEAD	LSL	0	1.75	1.75
System 55	DIST	2019-08-14	LEAD	LSL	1.24	1.07	-0.17
System 55	DIST	2019-08-14	LEAD	LSL	0	0	0
System 55	DIST	2019-08-14	LEAD	LSL	0	0	0
System 55	DIST	2019-08-14	LEAD	LSL	0	0	0
System 55	DIST	2019-08-14	LEAD	LSL	0	0	0
System 55	DIST	2019-08-14	LEAD	LSL	0	0	0
System 55	DIST	2019-08-14	LEAD	LSL	0	0	0
System 55	DIST	2019-08-14	LEAD	LSL	0	0	0
System 55	DIST	2019-08-14	LEAD	LSL	0	0	0
System 55	DIST	2019-08-14	LEAD	LSL	0	0	0
System 55	DIST	2019-08-14	LEAD	LSL	0	0	0
System 55	DIST	2019-08-14	LEAD	LSL	1.14	1.16	0.02
System 55	DIST	2019-08-14	LEAD	LSL	0	0	0
System 55	DIST	2019-08-14	LEAD	LSL	1.14	0	-1.14
System 55	DIST	2019-08-14	LEAD	LSL	0	0	0
System 55	DIST	2019-08-14	LEAD	LSL	0	0	0
System 57	DIST	2019-07-23	LEAD	LSL	1.8	2.5	0.7
System 57	DIST	2019-07-23	LEAD	LSL	0	0	0
System 57	DIST	2019-07-24	LEAD	LSL	0	0	0
System 57	DIST	2019-07-23	LEAD	LSL	0	0	0
System 57	DIST	2019-07-22	LEAD	LSL	1.8	1.3	-0.5
System 57	DIST	2019-08-02	LEAD	LSL	1.4	4.5	3.1
System 57	DIST	2019-08-02	LEAD	LSL	1.2	1.2	0
System 57	DIST	2019-07-30	LEAD	LSL	3.2	3.3	0.1
System 57	DIST	2019-07-31	LEAD	LSL	47	4.4	-42.6
System 57	DIST	2019-08-05	LEAD	LSL	0	0	0
System 57	DIST	2019-08-03	LEAD	LSL	0	0	0
System 57	DIST	2019-08-15	LEAD	LSL	3.3	3.5	0.2
System 57	DIST	2019-08-20	LEAD	LSL	0	0	0
System 57	DIST	2019-08-16	LEAD	LSL	3	3.2	0.2
System 57	DIST	2019-08-17	LEAD	LSL	1.7	5.6	3.9
System 57	DIST	2019-08-18	LEAD	LSL	0	0	0
System 57	DIST	2019-08-18	LEAD	LSL	1.4	3.1	1.7
System 57	DIST	2019-09-20	LEAD	LSL	7.7	26	18.3
System 57	DIST	2019-08-27	LEAD	LSL	0	0	0
System 57	DIST	2019-09-23	LEAD	LSL	5.3	5.5	0.2
System 58	DIST	2019-09-19	LEAD	LSL	11	17	6
System 58	DIST	2019-09-18	LEAD	LSL	2	2	0
System 58	DIST	2019-09-24	LEAD	LSL	2	2	0
System 58	DIST	2019-09-23	LEAD	LSL	0	0	0
System 58	DIST	2019-09-17	LEAD	LSL	64	8	-56
System 58	DIST	2019-09-20	LEAD	LSL	4	0	-4
System 58	DIST	2019-09-24	LEAD	LSL	2	2	0
System 58	DIST	2019-09-18	LEAD	LSL	1	1	0
System 58	DIST	2019-09-20	LEAD	LSL	3	11	8
System 58	DIST	2019-09-20	LEAD	LSL	4	12	8
System 58	DIST	2019-09-18	LEAD	LSL	0	0	0
System 58	DIST	2019-09-24	LEAD	LSL	3	4	1
System 58	DIST	2019-09-25	LEAD	LSL	5	7	2
System 58	DIST	2019-09-25	LEAD	LSL	7	6	-1
System 58	DIST	2019-09-25	LEAD	LSL	3	7	4
System 58	DIST	2019-09-19	LEAD	LSL	0	0	0
System 58	DIST	2019-09-18	LEAD	LSL	3	21	18
System 58	DIST	2019-09-19	LEAD	LSL	2	3	1
System 58	DIST	2019-09-20	LEAD	LSL	2	2	0
System 58	DIST	2019-09-24	LEAD	LSL	4	25	21
System 58	DIST	2019-09-27	LEAD	LSL	1	7	6
System 58	DIST	2019-09-27	LEAD	LSL	2	1	-1
System 58	DIST	2019-09-26	LEAD	LSL	1	1	0
System 59	DIST	2019-07-17	LEAD	LSL	4.1	2.9	-1.2
System 59	DIST	2019-07-12	LEAD	LSL	0.92	0.14	-0.78
System 59	DIST	2019-07-17	LEAD	LSL	5	1.3	-3.7
System 59	DIST	2019-07-17	LEAD	LSL	2.4	0.43	-1.97
System 59	DIST	2019-07-14	LEAD	LSL	6.9	0.82	-6.08
System 59	DIST	2019-07-12	LEAD	LSL	5.2	1	-4.2
System 59	DIST	2019-07-17	LEAD	LSL	5.2	0.74	-4.46
System 59	DIST	2019-07-15	LEAD	LSL	1.7	1.6	-0.1
System 59	DIST	2019-07-13	LEAD	LSL	6.4	1.1	-5.3
System 59	DIST	2019-07-16	LEAD	LSL	0.94	1.2	0.26
System 59	DIST	2019-07-12	LEAD	LSL	0.62	0.28	-0.34
System 59	DIST	2019-07-13	LEAD	LSL	1	0.4	-0.6
System 59	DIST	2019-07-12	LEAD	LSL	0.51	0.27	-0.24
System 59	DIST	2019-07-11	LEAD	LSL	5.2	0.66	-4.54
System 59	DIST	2019-07-14	LEAD	LSL	1.4	0.24	-1.16
System 59	DIST	2019-07-12	LEAD	LSL	0.57	0.31	-0.26
System 59	DIST	2019-07-13	LEAD	LSL	7.3	0.5	-6.8
System 59	DIST	2019-07-16	LEAD	LSL	6.8	1.7	-5.1
System 59	DIST	2019-07-18	LEAD	LSL	2.5	0.68	-1.82
System 59	DIST	2019-07-14	LEAD	LSL	3.3	0.6	-2.7
System 59	DIST	2019-07-16	LEAD	LSL	4	1	-3
System 59	DIST	2019-07-16	LEAD	LSL	5.4	2.1	-3.3
System 60	DIST	2019-07-31	LEAD	LSL	0.14	0	-0.14
System 60	DIST	2019-07-30	LEAD	LSL	0.31	0	-0.31
System 60	DIST	2019-07-30	LEAD	LSL	0.84	0.12	-0.72
System 60	DIST	2019-07-30	LEAD	LSL	0.15	0	-0.15
System 60	DIST	2019-07-30	LEAD	LSL	0.24	0.39	0.15
System 60	DIST	2019-07-30	LEAD	LSL	0.18	0.12	-0.06
System 60	DIST	2019-07-30	LEAD	LSL	0.63	0.53	-0.1
System 60	DIST	2019-07-30	LEAD	LSL	0.16	0	-0.16
System 60	DIST	2019-07-31	LEAD	LSL	0.21	0	-0.21
System 60	DIST	2019-07-30	LEAD	LSL	0.49	0.38	-0.11
System 60	DIST	2019-07-30	LEAD	LSL	0.14	0.1	-0.04
System 60	DIST	2019-07-30	LEAD	LSL	0.27	1.1	0.83
System 60	DIST	2019-07-30	LEAD	LSL	0.14	0	-0.14
System 60	DIST	2019-07-30	LEAD	LSL	0.3	0	-0.3
System 60	DIST	2019-07-30	LEAD	LSL	0.12	0	-0.12
System 60	DIST	2019-07-31	LEAD	LSL	0.56	0.22	-0.34
System 60	DIST	2019-07-30	LEAD	LSL	0	0	0
System 60	DIST	2019-07-31	LEAD	LSL	0	0	0
System 60	DIST	2019-07-30	LEAD	LSL	0	0.11	0.11
System 60	DIST	2019-07-29	LEAD	LSL	2.6	0.78	-1.82
System 61	DIST	2019-07-17	LEAD	LSL	0	0	0
System 61	DIST	2019-07-17	LEAD	LSL	0	0	0
System 61	DIST	2019-07-17	LEAD	LSL	0	0	0
System 61	DIST	2019-07-16	LEAD	LSL	0	0	0
System 61	DIST	2019-07-19	LEAD	LSL	3	4	1
System 61	DIST	2019-07-16	LEAD	LSL	1	0	-1
System 61	DIST	2019-07-16	LEAD	LSL	0	0	0
System 61	DIST	2019-07-16	LEAD	LSL	0	0	0
System 61	DIST	2019-07-20	LEAD	LSL	0	3	3
System 61	DIST	2019-07-31	LEAD	LSL	0	0	0
System 61	DIST	2019-07-26	LEAD	LSL	0	0	0
System 61	DIST	2019-07-31	LEAD	LSL	0	0	0
System 61	DIST	2019-07-26	LEAD	LSL	0	0	0
System 61	DIST	2019-08-06	LEAD	LSL	0	0	0
System 61	DIST	2019-07-30	LEAD	LSL	0	0	0
System 61	DIST	2019-07-25	LEAD	LSL	0	0	0
System 61	DIST	2019-07-31	LEAD	LSL	0	9	9
System 61	DIST	2019-08-09	LEAD	LSL	8	1	-7
System 61	DIST	2019-08-09	LEAD	LSL	1	2	1
System 61	DIST	2019-08-12	LEAD	LSL	7	20	13
System 61	DIST	2019-08-19	LEAD	LSL	1	1	0
System 61	DIST	2019-08-16	LEAD	LSL	0	0	0
System 61	DIST	2019-08-11	LEAD	LSL	0	0	0
System 61	DIST	2019-08-19	LEAD	LSL	0	0	0
System 61	DIST	2019-08-10	LEAD	LSL	0	2	2
System 61	DIST	2019-08-11	LEAD	LSL	0	0	0
System 61	DIST	2019-08-19	LEAD	LSL	0	0	0
System 61	DIST	2019-08-23	LEAD	LSL	0	0	0
System 61	DIST	2019-08-27	LEAD	LSL	0	0	0
System 61	DIST	2019-08-27	LEAD	LSL	2	13	11
System 61	DIST	2019-08-27	LEAD	LSL	3	3	0
System 61	DIST	2019-08-25	LEAD	LSL	0	0	0
System 61	DIST	2019-08-30	LEAD	LSL	0	0	0
System 61	DIST	2019-09-19	LEAD	LSL	10	15	5
System 62	DIST	2019-06-11	LEAD	LSL	1.49	0	-1.49
System 62	DIST	2019-06-12	LEAD	LSL	0	0	0
System 62	DIST	2019-06-11	LEAD	LSL	3.12	4.7	1.58
System 62	DIST	2019-06-14	LEAD	LSL	0	0	0
System 62	DIST	2019-06-13	LEAD	LSL	1.51	1.02	-0.49
System 62	DIST	2019-06-19	LEAD	LSL	1.05	0	-1.05
System 62	DIST	2019-06-28	LEAD	LSL	1.23	0	-1.23
System 62	DIST	2019-06-25	LEAD	LSL	0	0	0
System 62	DIST	2019-06-27	LEAD	LSL	0	0	0
System 62	DIST	2019-07-01	LEAD	LSL	0	0	0
System 62	DIST	2019-06-28	LEAD	LSL	1.13	1.54	0.41
System 62	DIST	2019-07-09	LEAD	LSL	0	0	0
System 62	DIST	2019-07-10	LEAD	LSL	0	0	0
System 62	DIST	2019-07-29	LEAD	LSL	1.97	0	-1.97
System 62	DIST	2019-08-15	LEAD	LSL	0	0	0
System 62	DIST	2019-09-15	LEAD	LSL	0	0	0
System 62	DIST	2019-09-15	LEAD	LSL	0	0	0
System 62	DIST	2019-09-14	LEAD	LSL	2.15	0	-2.15
System 62	DIST	2019-09-15	LEAD	LSL	0	0	0
System 62	DIST	2019-09-13	LEAD	LSL	0	0	0
System 65	DIST	2019-06-07	LEAD	LSL	7.44	6.62	-0.82
System 65	DIST	2019-06-07	LEAD	LSL	5.84	5.85	0.01
System 65	DIST	2019-06-07	LEAD	LSL	4.94	4.96	0.02
System 65	DIST	2019-06-07	LEAD	LSL	5.2	4.86	-0.34
System 65	DIST	2019-06-08	LEAD	LSL	8.31	4.39	-3.92
System 65	DIST	2019-06-08	LEAD	LSL	12.5	8.64	-3.86
System 65	DIST	2019-06-08	LEAD	LSL	5.01	5.5	0.49
System 65	DIST	2019-06-09	LEAD	LSL	8.23	6.6	-1.63
System 65	DIST	2019-06-10	LEAD	LSL	7.31	6.71	-0.6
System 65	DIST	2019-06-13	LEAD	LSL	7.85	6.24	-1.61
System 65	DIST	2019-12-20	LEAD	LSL	0	0	0
System 65	DIST	2019-12-18	LEAD	LSL	0	0	0
System 65	DIST	2019-10-31	LEAD	LSL	1.4	0.083	-1.317
System 65	DIST	2019-11-05	LEAD	LSL	0.41	0.24	-0.17
System 65	DIST	2019-11-01	LEAD	LSL	1.5	0.12	-1.38
System 65	DIST	2019-11-07	LEAD	LSL	0.18	0.25	0.07
System 65	DIST	2019-11-07	LEAD	LSL	0.16	0.048	-0.112
System 65	DIST	2019-11-07	LEAD	LSL	0.037	0	-0.037
System 65	DIST	2019-11-19	LEAD	LSL	0.33	0.14	-0.19
System 65	DIST	2019-11-26	LEAD	LSL	0.28	0	-0.28
System 65	DIST	2019-11-27	LEAD	LSL	0.11	0	-0.11
System 65	DIST	2019-11-22	LEAD	LSL	0.25	0	-0.25
System 65	DIST	2019-11-20	LEAD	LSL	0.21	0	-0.21
System 65	DIST	2019-11-20	LEAD	LSL	0.22	0	-0.22
System 65	DIST	2019-11-20	LEAD	LSL	0.14	0	-0.14
System 65	DIST	2019-11-20	LEAD	LSL	0.23	0.11	-0.12
System 65	DIST	2019-11-21	LEAD	LSL	0.59	0.14	-0.45
System 65	DIST	2019-11-26	LEAD	LSL	0.19	0	-0.19
System 65	DIST	2019-11-26	LEAD	LSL	0.32	0.072	-0.248
System 65	DIST	2019-11-26	LEAD	LSL	0.84	0.18	-0.66
System 66	DIST	2019-05-22	LEAD	LSL	0	0	0
System 66	DIST	2019-05-22	LEAD	LSL	0	0	0
System 66	DIST	2019-05-24	LEAD	LSL	0	0	0
System 66	DIST	2019-05-24	LEAD	LSL	0	0	0
System 66	DIST	2019-05-24	LEAD	LSL	1.6	12	10.4
System 66	DIST	2019-05-24	LEAD	LSL	0	0	0
System 66	DIST	2019-05-24	LEAD	LSL	0	0	0
System 66	DIST	2019-05-24	LEAD	LSL	0	0	0
System 66	DIST	2019-05-24	LEAD	LSL	0	0	0
System 66	DIST	2019-05-24	LEAD	LSL	0	0	0
System 66	DIST	2019-05-24	LEAD	LSL	0	0	0
System 66	DIST	2019-05-24	LEAD	LSL	1.2	0	-1.2
System 66	DIST	2019-05-25	LEAD	LSL	0	0	0
System 66	DIST	2019-05-28	LEAD	LSL	0	0	0
System 66	DIST	2019-05-28	LEAD	LSL	0	0	0
System 66	DIST	2019-05-28	LEAD	LSL	0	0	0
System 66	DIST	2019-05-28	LEAD	LSL	1.1	0	-1.1
System 66	DIST	2019-05-28	LEAD	LSL	0	0	0
System 66	DIST	2019-05-28	LEAD	LSL	0	0	0
System 66	DIST	2019-05-28	LEAD	LSL	0	0	0
System 66	DIST	2019-05-29	LEAD	LSL	0	0	0
System 66	DIST	2019-05-29	LEAD	LSL	0	0	0
System 66	DIST	2019-05-29	LEAD	LSL	4.9	0	-4.9
System 66	DIST	2019-05-29	LEAD	LSL	0	0	0
System 66	DIST	2019-05-29	LEAD	LSL	0	0	0
System 66	DIST	2019-05-29	LEAD	LSL	0	0	0
System 66	DIST	2019-05-29	LEAD	LSL	0	0	0
System 66	DIST	2019-05-29	LEAD	LSL	0	1.8	1.8
System 66	DIST	2019-06-04	LEAD	LSL	2	1.3	-0.7
System 66	DIST	2019-06-04	LEAD	LSL	0	0	0
System 66	DIST	2019-06-04	LEAD	LSL	0	0	0
System 66	DIST	2019-06-04	LEAD	LSL	2.5	1.3	-1.2
System 66	DIST	2019-06-04	LEAD	LSL	1.8	0	-1.8
System 66	DIST	2019-06-04	LEAD	LSL	1.7	1	-0.7
System 66	DIST	2019-06-04	LEAD	LSL	0	0	0
System 66	DIST	2019-06-04	LEAD	LSL	0	0	0
System 66	DIST	2019-06-04	LEAD	LSL	0	0	0
System 66	DIST	2019-06-04	LEAD	LSL	0	0	0
System 66	DIST	2019-06-04	LEAD	LSL	3.3	1.6	-1.7
System 66	DIST	2019-06-04	LEAD	LSL	0	0	0
System 66	DIST	2019-06-04	LEAD	LSL	0	0	0
System 66	DIST	2019-06-04	LEAD	LSL	0	0	0
System 66	DIST	2019-06-04	LEAD	LSL	0	0	0
System 66	DIST	2019-06-04	LEAD	LSL	0	0	0
System 66	DIST	2019-06-04	LEAD	LSL	0	0	0
System 66	DIST	2019-06-04	LEAD	LSL	0	0	0
System 66	DIST	2019-06-04	LEAD	LSL	0	0	0
System 66	DIST	2019-06-04	LEAD	LSL	0	0	0
System 66	DIST	2019-06-04	LEAD	LSL	0	0	0
System 66	DIST	2019-06-06	LEAD	LSL	0	0	0
System 66	DIST	2019-06-06	LEAD	LSL	0	0	0
System 67	DIST	2019-09-14	LEAD	LSL	0	0	0
System 67	DIST	2019-09-16	LEAD	LSL	0	0	0
System 67	DIST	2019-09-15	LEAD	LSL	0	0	0
System 67	DIST	2019-09-16	LEAD	LSL	0	0	0
System 67	DIST	2019-09-15	LEAD	LSL	0	0	0
System 67	DIST	2019-09-12	LEAD	LSL	0	0	0
System 67	DIST	2019-09-19	LEAD	LSL	0	0	0
System 67	DIST	2019-09-15	LEAD	LSL	0	0	0
System 67	DIST	2019-09-18	LEAD	LSL	0	0	0
System 67	DIST	2019-09-14	LEAD	LSL	0	0	0
System 67	DIST	2019-09-14	LEAD	LSL	0	0	0
System 67	DIST	2019-09-16	LEAD	LSL	0	0	0
System 67	DIST	2019-09-16	LEAD	LSL	0	0	0
System 67	DIST	2019-09-15	LEAD	LSL	0	0	0
System 67	DIST	2019-09-14	LEAD	LSL	0	0	0
System 67	DIST	2019-09-13	LEAD	LSL	0	0	0
System 67	DIST	2019-09-16	LEAD	LSL	0	0	0
System 67	DIST	2019-09-14	LEAD	LSL	0	0	0
System 67	DIST	2019-09-13	LEAD	LSL	0	0	0
System 67	DIST	2019-09-13	LEAD	LSL	0	0	0
System 67	DIST	2019-09-15	LEAD	LSL	0	0	0
System 67	DIST	2019-09-15	LEAD	LSL	0	0	0
System 67	DIST	2019-09-16	LEAD	LSL	0	0	0
System 67	DIST	2019-09-13	LEAD	LSL	0	0	0
System 67	DIST	2019-09-12	LEAD	LSL	0	0	0
System 67	DIST	2019-09-18	LEAD	LSL	0	0	0
System 67	DIST	2019-09-15	LEAD	LSL	0	0	0
System 67	DIST	2019-09-15	LEAD	LSL	1.7	0	-1.7
System 67	DIST	2019-09-16	LEAD	LSL	0	0	0
System 67	DIST	2019-09-16	LEAD	LSL	0	0	0
System 68	DIST	2019-09-05	LEAD	LSL	1	1	0
System 68	DIST	2019-09-05	LEAD	LSL	1	5	4
System 68	DIST	2019-09-04	LEAD	LSL	27	3	-24
System 68	DIST	2019-09-05	LEAD	LSL	2	3	1
System 68	DIST	2019-09-05	LEAD	LSL	12	6	-6
System 68	DIST	2019-09-09	LEAD	LSL	0	1	1
System 68	DIST	2019-09-10	LEAD	LSL	4	9	5
System 68	DIST	2019-09-10	LEAD	LSL	7	8	1
System 68	DIST	2019-09-08	LEAD	LSL	2	5	3
System 68	DIST	2019-09-10	LEAD	LSL	2	2	0
System 68	DIST	2019-09-09	LEAD	LSL	0	5	5
System 68	DIST	2019-09-08	LEAD	LSL	3	3	0
System 68	DIST	2019-09-09	LEAD	LSL	32	18	-14
System 68	DIST	2019-09-11	LEAD	LSL	2	8	6
System 68	DIST	2019-09-11	LEAD	LSL	2	19	17
System 68	DIST	2019-09-11	LEAD	LSL	6	0	-6
System 68	DIST	2019-09-09	LEAD	LSL	4	2	-2
System 68	DIST	2019-09-11	LEAD	LSL	3	4	1
System 68	DIST	2019-09-19	LEAD	LSL	7	8	1
System 68	DIST	2019-09-25	LEAD	LSL	5	15	10
System 71	DIST	2019-07-31	LEAD	LSL	4	7.8	3.8
System 71	DIST	2019-07-24	LEAD	LSL	0	0	0
System 71	DIST	2019-07-31	LEAD	LSL	1.6	0.15	-1.45
System 71	DIST	2019-07-24	LEAD	LSL	0	0	0
System 71	DIST	2019-08-07	LEAD	LSL	0	0	0
System 71	DIST	2019-07-24	LEAD	LSL	0	5.95	5.95
System 71	DIST	2019-07-31	LEAD	LSL	1.5	2.7	1.2
System 71	DIST	2019-07-24	LEAD	LSL	0	0	0
System 71	DIST	2019-07-31	LEAD	LSL	0.79	4.1	3.31
System 71	DIST	2019-07-31	LEAD	LSL	2	2.1	0.1
System 71	DIST	2019-07-31	LEAD	LSL	2.5	12	9.5
System 71	DIST	2019-08-06	LEAD	LSL	48.4	6.79	-41.61
System 71	DIST	2019-08-06	LEAD	LSL	0	4.59	4.59
System 71	DIST	2019-08-07	LEAD	LSL	2.2	6.24	4.04
System 71	DIST	2019-08-07	LEAD	LSL	2.67	3.4	0.73
System 71	DIST	2019-09-03	LEAD	LSL	4.26	2.23	-2.03
System 71	DIST	2019-08-14	LEAD	LSL	13	24	11
System 71	DIST	2019-08-13	LEAD	LSL	1.6	2.2	0.6
System 71	DIST	2019-08-14	LEAD	LSL	1.1	4	2.9
System 71	DIST	2019-08-14	LEAD	LSL	2.2	8	5.8
System 71	DIST	2019-08-13	LEAD	LSL	3.6	6.4	2.8
System 71	DIST	2019-08-14	LEAD	LSL	4.7	7.4	2.7
System 71	DIST	2019-08-22	LEAD	LSL	2.1	1.7	-0.4
System 71	DIST	2019-08-22	LEAD	LSL	1.3	4.3	3
System 71	DIST	2019-08-22	LEAD	LSL	4.9	5.3	0.4
System 71	DIST	2019-08-22	LEAD	LSL	2.9	2.8	-0.1
System 71	DIST	2019-08-22	LEAD	LSL	0	0.41	0.41
System 71	DIST	2019-08-29	LEAD	LSL	0	0	0
System 71	DIST	2019-08-28	LEAD	LSL	2.43	8.25	5.82
System 71	DIST	2019-08-29	LEAD	LSL	4.47	3.48	-0.99
System 72	DIST	2019-08-22	LEAD	LSL	0	0	0
System 72	DIST	2019-08-22	LEAD	LSL	0	0	0
System 72	DIST	2019-08-23	LEAD	LSL	2.39	0	-2.39
System 72	DIST	2019-08-24	LEAD	LSL	0	4.67	4.67
System 72	DIST	2019-08-22	LEAD	LSL	0	15.59	15.59
System 72	DIST	2019-08-23	LEAD	LSL	0	7.23	7.23
System 72	DIST	2019-08-22	LEAD	LSL	0	5.09	5.09
System 72	DIST	2019-08-22	LEAD	LSL	0	0	0
System 72	DIST	2019-08-21	LEAD	LSL	0	2.62	2.62
System 72	DIST	2019-08-22	LEAD	LSL	0	0	0
System 72	DIST	2019-08-22	LEAD	LSL	0	8.89	8.89
System 72	DIST	2019-08-22	LEAD	LSL	0	0	0
System 72	DIST	2019-08-22	LEAD	LSL	0	10.99	10.99
System 72	DIST	2019-09-10	LEAD	LSL	0	0	0
System 72	DIST	2019-09-10	LEAD	LSL	0	0	0
System 72	DIST	2019-09-10	LEAD	LSL	0	0	0
System 72	DIST	2019-09-16	LEAD	LSL	4.08	7.75	3.67
System 72	DIST	2019-09-16	LEAD	LSL	0	0	0
System 72	DIST	2019-09-10	LEAD	LSL	0	0	0
System 72	DIST	2019-09-11	LEAD	LSL	0	0	0
System 73	DIST	2019-07-15	LEAD	LSL	0	0	0
System 73	DIST	2019-07-17	LEAD	LSL	0	0	0
System 73	DIST	2019-07-18	LEAD	LSL	0	0	0
System 73	DIST	2019-07-18	LEAD	LSL	0	0	0
System 73	DIST	2019-07-18	LEAD	LSL	0	0	0
System 73	DIST	2019-07-19	LEAD	LSL	5.08	5.06	-0.02
System 73	DIST	2019-07-23	LEAD	LSL	6	2.3	-3.7
System 73	DIST	2019-07-24	LEAD	LSL	3.8	14	10.2
System 73	DIST	2019-07-25	LEAD	LSL	0	0	0
System 73	DIST	2019-07-26	LEAD	LSL	2	14	12
System 73	DIST	2019-07-29	LEAD	LSL	0	0	0
System 73	DIST	2019-07-30	LEAD	LSL	0	0	0
System 73	DIST	2019-07-31	LEAD	LSL	0	0	0
System 73	DIST	2019-07-31	LEAD	LSL	0	0	0
System 73	DIST	2019-08-01	LEAD	LSL	0	0	0
System 73	DIST	2019-08-05	LEAD	LSL	0.39	0	-0.39
System 73	DIST	2019-08-08	LEAD	LSL	3.8	4.2	0.4
System 73	DIST	2019-08-08	LEAD	LSL	5.6	5.5	-0.1
System 73	DIST	2019-08-13	LEAD	LSL	1	0.69	-0.31
System 73	DIST	2019-08-20	LEAD	LSL	7.52	8.62	1.1
System 73	DIST	2019-08-21	LEAD	LSL	2.49	13.98	11.49
System 73	DIST	2019-08-27	LEAD	LSL	16.98	9.31	-7.67
System 73	DIST	2019-08-28	LEAD	LSL	0	0	0
System 73	DIST	2019-08-28	LEAD	LSL	3.22	2.45	-0.77
System 73	DIST	2019-08-28	LEAD	LSL	8.3	13.93	5.63
System 73	DIST	2019-08-28	LEAD	LSL	0	0	0
System 73	DIST	2019-08-29	LEAD	LSL	4.45	0	-4.45
System 73	DIST	2019-08-29	LEAD	LSL	0	0	0
System 73	DIST	2019-08-30	LEAD	LSL	0	0	0
System 74	DIST	2019-07-29	LEAD	LSL	1.4	0	-1.4
System 74	DIST	2019-07-29	LEAD	LSL	0	0	0
System 74	DIST	2019-07-31	LEAD	LSL	0	2.6	2.6
System 74	DIST	2019-08-01	LEAD	LSL	0	0	0
System 74	DIST	2019-08-01	LEAD	LSL	1.3	0	-1.3
System 74	DIST	2019-08-01	LEAD	LSL	1.5	0	-1.5
System 74	DIST	2019-08-05	LEAD	LSL	1.7	0	-1.7
System 74	DIST	2019-08-06	LEAD	LSL	1.1	0	-1.1
System 74	DIST	2019-08-06	LEAD	LSL	1	0	-1
System 74	DIST	2019-08-14	LEAD	LSL	0	0	0
System 74	DIST	2019-08-14	LEAD	LSL	0	0	0
System 74	DIST	2019-08-19	LEAD	LSL	0	0	0
System 74	DIST	2019-08-19	LEAD	LSL	0	0	0
System 74	DIST	2019-08-20	LEAD	LSL	1.6	0	-1.6
System 74	DIST	2019-09-05	LEAD	LSL	4.1	0	-4.1
System 74	DIST	2019-09-05	LEAD	LSL	2	0	-2
System 74	DIST	2019-09-06	LEAD	LSL	1.2	0	-1.2
System 74	DIST	2019-09-06	LEAD	LSL	0	0	0
System 74	DIST	2019-09-06	LEAD	LSL	0	0	0
System 74	DIST	2019-09-06	LEAD	LSL	1.7	0	-1.7
System 78	DIST	2019-09-09	LEAD	LSL	0	0	0
System 78	DIST	2019-09-09	LEAD	LSL	0	0	0
System 78	DIST	2019-09-09	LEAD	LSL	0	0	0
System 78	DIST	2019-09-11	LEAD	LSL	0	100	100
System 78	DIST	2019-09-11	LEAD	LSL	0	0	0
System 78	DIST	2019-09-11	LEAD	LSL	0	0	0
System 78	DIST	2019-09-13	LEAD	LSL	0	0	0
System 78	DIST	2019-09-13	LEAD	LSL	0	0	0
System 78	DIST	2019-09-12	LEAD	LSL	0	0	0
System 78	DIST	2019-09-13	LEAD	LSL	0	0	0
System 78	DIST	2019-09-12	LEAD	LSL	0	0	0
System 78	DIST	2019-09-12	LEAD	LSL	2	2	0
System 78	DIST	2019-09-12	LEAD	LSL	0	0	0
System 78	DIST	2019-09-16	LEAD	LSL	0	0	0
System 78	DIST	2019-09-16	LEAD	LSL	0	0	0
System 78	DIST	2019-09-20	LEAD	LSL	2	3	1
System 78	DIST	2019-09-20	LEAD	LSL	0	0	0
System 78	DIST	2019-09-25	LEAD	LSL	0	0	0
System 78	DIST	2019-09-24	LEAD	LSL	2	3	1
System 78	DIST	2019-09-28	LEAD	LSL	0	0	0
System 78	DIST	2019-09-28	LEAD	LSL	0	0	0
System 78	DIST	2019-09-27	LEAD	LSL	2	4	2
System 80	DIST	2019-07-30	LEAD	LSL	370	25	-345
System 80	DIST	2019-07-10	LEAD	LSL	201.65	19.53	-182.12
System 80	DIST	2019-06-28	LEAD	LSL	0	0	0
System 80	DIST	2019-07-01	LEAD	LSL	2.14	3.37	1.23
System 80	DIST	2019-07-02	LEAD	LSL	24.86	3.15	-21.71
System 80	DIST	2019-07-08	LEAD	LSL	7.61	385.04	377.43
System 80	DIST	2019-07-15	LEAD	LSL	4.5	9.04	4.54
System 80	DIST	2019-07-15	LEAD	LSL	8.7	7.38	-1.32
System 80	DIST	2019-07-17	LEAD	LSL	2.13	0	-2.13
System 80	DIST	2019-07-18	LEAD	LSL	2.47	3.28	0.81
System 80	DIST	2019-07-29	LEAD	LSL	2.16	263.75	261.59
System 80	DIST	2019-07-23	LEAD	LSL	234.23	373.72	139.49
System 80	DIST	2019-07-30	LEAD	LSL	1.5	21	19.5
System 80	DIST	2019-07-31	LEAD	LSL	2.5	2.8	0.3
System 80	DIST	2019-08-05	LEAD	LSL	0.76	2.1	1.34
System 80	DIST	2019-08-07	LEAD	LSL	12	12	0
System 80	DIST	2019-08-08	LEAD	LSL	6.4	6	-0.4
System 80	DIST	2019-08-08	LEAD	LSL	2.4	14	11.6
System 80	DIST	2019-08-09	LEAD	LSL	2	1.5	-0.5
System 80	DIST	2019-08-12	LEAD	LSL	7.2	1.7	-5.5
System 80	DIST	2019-08-13	LEAD	LSL	5.3	3.1	-2.2
System 80	DIST	2019-08-13	LEAD	LSL	4.4	4.1	-0.3
System 80	DIST	2019-08-13	LEAD	LSL	34	1100	1066
System 80	DIST	2019-08-14	LEAD	LSL	1.3	12	10.7
System 80	DIST	2019-08-14	LEAD	LSL	12	14	2
System 80	DIST	2019-08-15	LEAD	LSL	0.34	0.37	0.03
System 80	DIST	2019-08-15	LEAD	LSL	2.8	4.7	1.9
System 80	DIST	2019-08-15	LEAD	LSL	7.9	1.7	-6.2
System 80	DIST	2019-08-16	LEAD	LSL	2	4.6	2.6
System 81	DIST	2019-08-26	LEAD	LSL	2	3	1
System 81	DIST	2019-08-27	LEAD	LSL	3	2	-1
System 81	DIST	2019-08-26	LEAD	LSL	0	0	0
System 81	DIST	2019-08-25	LEAD	LSL	0	0	0
System 81	DIST	2019-08-26	LEAD	LSL	4	19	15
System 81	DIST	2019-08-26	LEAD	LSL	1	4	3
System 81	DIST	2019-08-25	LEAD	LSL	0	0	0
System 81	DIST	2019-08-27	LEAD	LSL	0	0	0
System 81	DIST	2019-08-27	LEAD	LSL	1	1	0
System 81	DIST	2019-08-27	LEAD	LSL	3	0	-3
System 81	DIST	2019-08-25	LEAD	LSL	0	0	0
System 81	DIST	2019-08-26	LEAD	LSL	0	0	0
System 81	DIST	2019-08-26	LEAD	LSL	0	0	0
System 81	DIST	2019-08-27	LEAD	LSL	6	1	-5
System 81	DIST	2019-08-27	LEAD	LSL	2	4	2
System 81	DIST	2019-08-27	LEAD	LSL	36	4	-32
System 81	DIST	2019-08-27	LEAD	LSL	0	0	0
System 81	DIST	2019-08-29	LEAD	LSL	0	0	0
System 81	DIST	2019-08-28	LEAD	LSL	0	0	0
System 81	DIST	2019-08-30	LEAD	LSL	2	5	3
System 81	DIST	2019-09-02	LEAD	LSL	0	0	0
System 81	DIST	2019-08-30	LEAD	LSL	1	0	-1
System 81	DIST	2019-08-28	LEAD	LSL	1	8	7
System 81	DIST	2019-09-02	LEAD	LSL	1	7	6
System 81	DIST	2019-09-03	LEAD	LSL	0	0	0
System 81	DIST	2019-08-28	LEAD	LSL	4	6	2
System 81	DIST	2019-09-06	LEAD	LSL	2	2	0
System 81	DIST	2019-09-05	LEAD	LSL	4	2	-2
System 81	DIST	2019-09-06	LEAD	LSL	5	27	22
System 81	DIST	2019-09-04	LEAD	LSL	0	0	0
System 81	DIST	2019-09-09	LEAD	LSL	4	4	0
System 82	DIST	2019-09-16	LEAD	LSL	2.1	2	-0.1
System 82	DIST	2019-09-19	LEAD	LSL	110	3	-107
System 82	DIST	2019-09-12	LEAD	LSL	0	1.5	1.5
System 82	DIST	2019-09-12	LEAD	LSL	1.3	0	-1.3
System 82	DIST	2019-09-12	LEAD	LSL	0	0	0
System 82	DIST	2019-09-12	LEAD	LSL	1.7	1.9	0.2
System 82	DIST	2019-09-12	LEAD	LSL	0	0	0
System 82	DIST	2019-09-12	LEAD	LSL	1.3	1.9	0.6
System 82	DIST	2019-09-17	LEAD	LSL	0	0	0
System 82	DIST	2019-09-17	LEAD	LSL	0	0	0
System 82	DIST	2019-09-16	LEAD	LSL	0	0	0
System 82	DIST	2019-09-17	LEAD	LSL	1.5	0	-1.5
System 82	DIST	2019-09-14	LEAD	LSL	0	0	0
System 82	DIST	2019-09-17	LEAD	LSL	0	0	0
System 82	DIST	2019-09-27	LEAD	LSL	1.3	0	-1.3
System 82	DIST	2019-09-27	LEAD	LSL	1.2	0	-1.2
System 82	DIST	2019-09-26	LEAD	LSL	4.8	3.3	-1.5
System 82	DIST	2019-09-28	LEAD	LSL	2.3	3.6	1.3
System 82	DIST	2019-09-28	LEAD	LSL	0	0	0
System 82	DIST	2019-09-27	LEAD	LSL	0	0	0
System 82	DIST	2019-09-27	LEAD	LSL	0	0	0
System 82	DIST	2019-09-26	LEAD	LSL	990	1.3	-988.7
System 82	DIST	2019-09-27	LEAD	LSL	0	0	0
System 82	DIST	2019-09-27	LEAD	LSL	0	0	0
System 82	DIST	2019-09-27	LEAD	LSL	12	1.2	-10.8
System 82	DIST	2019-09-26	LEAD	LSL	0	0	0
System 82	DIST	2019-09-27	LEAD	LSL	0	0	0
System 82	DIST	2019-09-27	LEAD	LSL	2.9	1.2	-1.7
System 82	DIST	2019-09-27	LEAD	LSL	0	0	0
System 82	DIST	2019-09-26	LEAD	LSL	0	0	0
System 82	DIST	2019-09-27	LEAD	LSL	0	0	0
System 83	DIST	2019-03-20	LEAD	LSL	0	0	0
System 83	DIST	2019-03-19	LEAD	LSL	0	0	0
System 83	DIST	2019-04-16	LEAD	LSL	0	0	0
System 83	DIST	2019-04-15	LEAD	LSL	0	0	0
System 83	DIST	2019-04-23	LEAD	LSL	0	0	0
System 83	DIST	2019-04-24	LEAD	LSL	0	0	0
System 83	DIST	2019-04-23	LEAD	LSL	2	7	5
System 83	DIST	2019-04-23	LEAD	LSL	0	0	0
System 83	DIST	2019-04-22	LEAD	LSL	1	0	-1
System 83	DIST	2019-04-23	LEAD	LSL	0	0	0
System 83	DIST	2019-04-23	LEAD	LSL	0	0	0
System 83	DIST	2019-04-23	LEAD	LSL	0	0	0
System 83	DIST	2019-04-23	LEAD	LSL	15	0	-15
System 83	DIST	2019-04-23	LEAD	LSL	0	0	0
System 83	DIST	2019-04-23	LEAD	LSL	4	2	-2
System 83	DIST	2019-04-23	LEAD	LSL	0	0	0
System 83	DIST	2019-04-25	LEAD	LSL	0	0	0
System 83	DIST	2019-04-24	LEAD	LSL	0	0	0
System 83	DIST	2019-04-24	LEAD	LSL	1	1	0
System 83	DIST	2019-05-20	LEAD	LSL	0	0	0
System 83	DIST	2019-05-21	LEAD	LSL	0	2	2
System 83	DIST	2019-06-17	LEAD	LSL	0	0	0
System 83	DIST	2019-06-18	LEAD	LSL	6	0	-6
System 83	DIST	2019-07-15	LEAD	LSL	0	0	0
System 83	DIST	2019-07-17	LEAD	LSL	0	0	0
System 83	DIST	2019-08-20	LEAD	LSL	0	6	6
System 83	DIST	2019-08-19	LEAD	LSL	2	2	0
System 83	DIST	2019-09-17	LEAD	LSL	1	3	2
System 83	DIST	2019-09-19	LEAD	LSL	0	0	0
System 83	DIST	2019-10-23	LEAD	LSL	0	0	0
System 83	DIST	2019-10-23	LEAD	LSL	0	2	2
System 83	DIST	2019-10-28	LEAD	LSL	0	2	2
System 83	DIST	2019-10-23	LEAD	LSL	2	2	0
System 83	DIST	2019-10-23	LEAD	LSL	0	0	0
System 83	DIST	2019-10-28	LEAD	LSL	1	0	-1
System 83	DIST	2019-10-22	LEAD	LSL	1	0	-1
System 83	DIST	2019-10-24	LEAD	LSL	0	0	0
System 83	DIST	2019-10-24	LEAD	LSL	2	4	2
System 83	DIST	2019-10-23	LEAD	LSL	7	0	-7
System 83	DIST	2019-10-23	LEAD	LSL	0	0	0
System 83	DIST	2019-10-23	LEAD	LSL	2	0	-2
System 83	DIST	2019-10-29	LEAD	LSL	1	2	1
System 83	DIST	2019-10-29	LEAD	LSL	0	0	0
System 84	DIST	2019-07-24	LEAD	LSL	1.4	0.32	-1.08
System 84	DIST	2019-07-25	LEAD	LSL	2.2	0.51	-1.69
System 84	DIST	2019-07-25	LEAD	LSL	1	0.74	-0.26
System 84	DIST	2019-07-25	LEAD	LSL	4	1.4	-2.6
System 84	DIST	2019-07-23	LEAD	LSL	0.92	0.43	-0.49
System 84	DIST	2019-07-23	LEAD	LSL	1.4	0.57	-0.83
System 84	DIST	2019-07-23	LEAD	LSL	0.91	0.94	0.03
System 84	DIST	2019-07-24	LEAD	LSL	1.8	0.7	-1.1
System 84	DIST	2019-07-24	LEAD	LSL	1.3	0.6	-0.7
System 84	DIST	2019-07-23	LEAD	LSL	0.84	0.44	-0.4
System 84	DIST	2019-07-24	LEAD	LSL	0.69	0.56	-0.13
System 84	DIST	2019-07-24	LEAD	LSL	0.14	0.22	0.08
System 84	DIST	2019-07-25	LEAD	LSL	0.91	0.45	-0.46
System 84	DIST	2019-07-24	LEAD	LSL	9.6	2.1	-7.5
System 84	DIST	2019-07-24	LEAD	LSL	4.3	0.41	-3.89
System 84	DIST	2019-07-23	LEAD	LSL	3.2	11	7.8
System 84	DIST	2019-07-23	LEAD	LSL	1.1	0.63	-0.47
System 84	DIST	2019-07-23	LEAD	LSL	1.7	0.27	-1.43
System 84	DIST	2019-07-23	LEAD	LSL	1.2	0.35	-0.85
System 84	DIST	2019-07-22	LEAD	LSL	0.39	1.8	1.41
System 84	DIST	2019-07-23	LEAD	LSL	1.4	2.2	0.8
System 84	DIST	2019-07-25	LEAD	LSL	0.52	0.24	-0.28
System 86	DIST	2019-08-06	LEAD	LSL	1.3	14	12.7
System 86	DIST	2019-09-10	LEAD	LSL	5.5	11	5.5
System 86	DIST	2019-09-10	LEAD	LSL	5.2	4.8	-0.4
System 86	DIST	2019-09-11	LEAD	LSL	1.6	11	9.4
System 86	DIST	2019-09-11	LEAD	LSL	7.2	10	2.8
System 86	DIST	2019-09-12	LEAD	LSL	20	24	4
System 86	DIST	2019-09-12	LEAD	LSL	8.5	25	16.5
System 86	DIST	2019-09-16	LEAD	LSL	7.5	18	10.5
System 86	DIST	2019-09-12	LEAD	LSL	4.3	23	18.7
System 86	DIST	2019-09-18	LEAD	LSL	3.7	11	7.3
System 86	DIST	2019-09-20	LEAD	LSL	3.5	5.7	2.2
System 86	DIST	2019-09-17	LEAD	LSL	5.1	3.7	-1.4
System 86	DIST	2019-09-20	LEAD	LSL	12	21	9
System 86	DIST	2019-09-18	LEAD	LSL	3.7	13	9.3
System 86	DIST	2019-09-26	LEAD	LSL	2.7	17	14.3
System 86	DIST	2019-09-20	LEAD	LSL	6	39	33
System 86	DIST	2019-09-24	LEAD	LSL	5.7	15	9.3
System 86	DIST	2019-09-24	LEAD	LSL	13	37	24
System 86	DIST	2019-09-25	LEAD	LSL	3.4	4.8	1.4
System 86	DIST	2019-09-20	LEAD	LSL	1.8	16	14.2
System 86	DIST	2019-09-26	LEAD	LSL	8	25	17
System 87	DIST	2019-05-21	LEAD	LSL	0	0	0
System 87	DIST	2019-05-21	LEAD	LSL	0	0	0
System 87	DIST	2019-05-20	LEAD	LSL	0	0	0
System 87	DIST	2019-05-21	LEAD	LSL	0	0	0
System 87	DIST	2019-05-21	LEAD	LSL	0	0	0
System 87	DIST	2019-05-22	LEAD	LSL	0	0	0
System 87	DIST	2019-05-21	LEAD	LSL	4	0	-4
System 87	DIST	2019-05-21	LEAD	LSL	0	0	0
System 87	DIST	2019-05-21	LEAD	LSL	0	0	0
System 87	DIST	2019-05-20	LEAD	LSL	0	0	0
System 87	DIST	2019-05-21	LEAD	LSL	0	0	0
System 87	DIST	2019-05-21	LEAD	LSL	0	0	0
System 87	DIST	2019-05-21	LEAD	LSL	0	0	0
System 87	DIST	2019-05-21	LEAD	LSL	0	0	0
System 87	DIST	2019-05-21	LEAD	LSL	0	0	0
System 87	DIST	2019-05-21	LEAD	LSL	3	0	-3
System 87	DIST	2019-05-21	LEAD	LSL	0	0	0
System 87	DIST	2019-05-22	LEAD	LSL	0	0	0
System 87	DIST	2019-05-22	LEAD	LSL	0	0	0
System 87	DIST	2019-05-30	LEAD	LSL	1	0	-1
System 87	DIST	2019-12-05	LEAD	LSL	0	0	0
System 87	DIST	2019-12-04	LEAD	LSL	0	0	0
System 87	DIST	2019-12-05	LEAD	LSL	0	0	0
System 87	DIST	2019-12-05	LEAD	LSL	0	0	0
System 87	DIST	2019-12-04	LEAD	LSL	0	0	0
System 87	DIST	2019-12-05	LEAD	LSL	0	0	0
System 87	DIST	2019-12-04	LEAD	LSL	0	0	0
System 87	DIST	2019-12-05	LEAD	LSL	0	0	0
System 87	DIST	2019-12-04	LEAD	LSL	0	0	0
System 87	DIST	2019-12-05	LEAD	LSL	0	0	0
System 87	DIST	2019-12-04	LEAD	LSL	0	0	0
System 87	DIST	2019-12-05	LEAD	LSL	1	0	-1
System 87	DIST	2019-12-13	LEAD	LSL	0	0	0
System 87	DIST	2019-12-16	LEAD	LSL	0	0	0
System 87	DIST	2019-12-11	LEAD	LSL	0	0	0
System 87	DIST	2019-12-11	LEAD	LSL	0	0	0
System 87	DIST	2019-12-12	LEAD	LSL	0	0	0
System 87	DIST	2019-12-12	LEAD	LSL	0	0	0
System 87	DIST	2019-12-13	LEAD	LSL	0	0	0
System 87	DIST	2019-12-12	LEAD	LSL	0	0	0
System 89	DIST	2019-07-26	LEAD	LSL	15	1.1	-13.9
System 89	DIST	2019-07-26	LEAD	LSL	0	0	0
System 89	DIST	2019-07-26	LEAD	LSL	0	0	0
System 89	DIST	2019-07-26	LEAD	LSL	0	0	0
System 89	DIST	2019-07-25	LEAD	LSL	0	0	0
System 89	DIST	2019-07-25	LEAD	LSL	1.3	0	-1.3
System 89	DIST	2019-07-25	LEAD	LSL	0	0	0
System 89	DIST	2019-08-02	LEAD	LSL	0	0	0
System 89	DIST	2019-08-01	LEAD	LSL	0	0	0
System 89	DIST	2019-08-02	LEAD	LSL	0	0	0
System 89	DIST	2019-08-01	LEAD	LSL	0	0	0
System 89	DIST	2019-07-29	LEAD	LSL	0	0	0
System 89	DIST	2019-08-01	LEAD	LSL	0	0	0
System 89	DIST	2019-08-01	LEAD	LSL	0	0	0
System 89	DIST	2019-07-31	LEAD	LSL	0	0	0
System 89	DIST	2019-08-01	LEAD	LSL	1	0	-1
System 89	DIST	2019-08-01	LEAD	LSL	0	0	0
System 89	DIST	2019-07-31	LEAD	LSL	0	0	0
System 89	DIST	2019-08-01	LEAD	LSL	0	0	0
System 89	DIST	2019-08-06	LEAD	LSL	0	0	0
System 89	DIST	2019-08-29	LEAD	LSL	0	0	0
System 93	DIST	2019-06-05	LEAD	LSL	0	0	0
System 93	DIST	2019-06-07	LEAD	LSL	0	0	0
System 93	DIST	2019-06-07	LEAD	LSL	0	0	0
System 93	DIST	2019-06-12	LEAD	LSL	2.5	4.8	2.3
System 93	DIST	2019-06-08	LEAD	LSL	2	0	-2
System 93	DIST	2019-06-10	LEAD	LSL	0	0	0
System 93	DIST	2019-06-12	LEAD	LSL	0	0	0
System 93	DIST	2019-06-12	LEAD	LSL	0	0	0
System 93	DIST	2019-06-10	LEAD	LSL	0	0	0
System 93	DIST	2019-06-13	LEAD	LSL	4.9	12	7.1
System 93	DIST	2019-06-13	LEAD	LSL	0	0	0
System 93	DIST	2019-06-10	LEAD	LSL	3	0	-3
System 93	DIST	2019-06-19	LEAD	LSL	0	0	0
System 93	DIST	2019-06-24	LEAD	LSL	0	0	0
System 93	DIST	2019-06-26	LEAD	LSL	2.6	0	-2.6
System 93	DIST	2019-06-27	LEAD	LSL	0	0	0
System 93	DIST	2019-07-01	LEAD	LSL	2.4	0	-2.4
System 93	DIST	2019-07-02	LEAD	LSL	0	0	0
System 93	DIST	2019-07-03	LEAD	LSL	0	0	0
System 93	DIST	2019-07-03	LEAD	LSL	0	0	0
System 93	DIST	2019-07-09	LEAD	LSL	0	0	0
System 93	DIST	2019-07-12	LEAD	LSL	2.4	2.8	0.4
System 93	DIST	2019-07-11	LEAD	LSL	0	0	0
System 93	DIST	2019-07-25	LEAD	LSL	0	0	0
System 93	DIST	2019-07-31	LEAD	LSL	0	0	0
System 93	DIST	2019-07-29	LEAD	LSL	3.2	0	-3.2
System 93	DIST	2019-07-27	LEAD	LSL	0	0	0
System 93	DIST	2019-07-31	LEAD	LSL	0	0	0
System 93	DIST	2019-08-01	LEAD	LSL	0	0	0
System 93	DIST	2019-08-08	LEAD	LSL	0	0	0
System 93	DIST	2019-08-08	LEAD	LSL	2.1	2	-0.1
System 93	DIST	2019-09-30	LEAD	LSL	0	0	0
System 94	DIST	2019-08-07	LEAD	LSL	2.9	1.3	-1.6
System 94	DIST	2019-08-27	LEAD	LSL	0	0	0
System 94	DIST	2019-08-06	LEAD	LSL	3.1	2.1	-1
System 94	DIST	2019-08-03	LEAD	LSL	5.3	5.7	0.4
System 94	DIST	2019-08-05	LEAD	LSL	0	0	0
System 94	DIST	2019-08-15	LEAD	LSL	2.36	7.7	5.34
System 94	DIST	2019-08-03	LEAD	LSL	0	0	0
System 94	DIST	2019-08-05	LEAD	LSL	0	0	0
System 94	DIST	2019-08-14	LEAD	LSL	0	0	0
System 94	DIST	2019-08-03	LEAD	LSL	1	2	1
System 94	DIST	2019-08-16	LEAD	LSL	0	0	0
System 94	DIST	2019-08-09	LEAD	LSL	0	4.66	4.66
System 94	DIST	2019-08-08	LEAD	LSL	6.58	6.09	-0.49
System 94	DIST	2019-08-03	LEAD	LSL	0.57	4	3.43
System 94	DIST	2019-08-05	LEAD	LSL	3.2	5.4	2.2
System 94	DIST	2019-08-14	LEAD	LSL	2.15	2.37	0.22
System 94	DIST	2019-08-05	LEAD	LSL	13	11	-2
System 94	DIST	2019-08-16	LEAD	LSL	0	0	0
System 94	DIST	2019-08-06	LEAD	LSL	1.2	6.4	5.2
System 94	DIST	2019-08-03	LEAD	LSL	2.16	0	-2.16
System 94	DIST	2019-08-23	LEAD	LSL	0	2.06	2.06
System 94	DIST	2019-08-28	LEAD	LSL	3.24	3.54	0.3
System 95	DIST	2019-08-12	LEAD	LSL	2.09	6.24	4.15
System 95	DIST	2019-08-01	LEAD	LSL	0	0	0
System 95	DIST	2019-07-31	LEAD	LSL	0	2.72	2.72
System 95	DIST	2019-07-31	LEAD	LSL	0	3.26	3.26
System 95	DIST	2019-07-31	LEAD	LSL	2.29	2.48	0.19
System 95	DIST	2019-08-06	LEAD	LSL	3.16	4.29	1.13
System 95	DIST	2019-08-06	LEAD	LSL	0	2.53	2.53
System 95	DIST	2019-07-31	LEAD	LSL	0	0	0
System 95	DIST	2019-08-01	LEAD	LSL	0	0	0
System 95	DIST	2019-08-07	LEAD	LSL	0	2.09	2.09
System 95	DIST	2019-08-08	LEAD	LSL	2.63	12.72	10.09
System 95	DIST	2019-08-20	LEAD	LSL	2.22	7.01	4.79
System 95	DIST	2019-08-20	LEAD	LSL	0	0	0
System 95	DIST	2019-08-20	LEAD	LSL	2.69	4.1	1.41
System 95	DIST	2019-08-21	LEAD	LSL	2.31	0	-2.31
System 95	DIST	2019-08-21	LEAD	LSL	0	0	0
System 95	DIST	2019-08-21	LEAD	LSL	0	0	0
System 95	DIST	2019-08-21	LEAD	LSL	0	0	0
System 95	DIST	2019-08-22	LEAD	LSL	0	0	0
System 95	DIST	2019-08-22	LEAD	LSL	0	0	0
[truncated: 912 more rows]
